# Supplementary material for: The classical Cuevas River section revisited: an update to the style and timing of deformation of the Aconcagua region based on new geological, structural and geochronological data (32°50′S)
Source: Frontiers journal article supplement (doi:10.3389/feart.2023.1219351), 2023-09-12
Supplement: Table_1.XLSX [file Table_1.XLSX]

## Sheet: Sample Di-1
Sample Di-1 (32.938852° S - 69.908368° W)
Laboratory of geochronology and Isotope Geochemistry (Brasilia, Brasil)
Identifier	206* (%)	204Pb cps	206Pb mV1	Th/U	206Pb/204Pb	1s%	207Pb/206Pb	1s %	207Pb/235U	1s %	206Pb/238U	1s %	Rho	207Pb/206Pb	2s abs	206Pb/238U	2s abs	207Pb/235U	2s abs	% U-Pb disc5	% U-Pb disc6	Best Age7	2s abs
130-ZR98	0.201222	14.4558	0.000237914	0.387686	7763.64	29.2474	0.0475988	1.50792	0.0947029	1.66175	0.0144289	0.591862	0.356167	79.3726	70.8459	92.3502	1.08533	91.8749	2.91731	-16.3502	-0.517246	92.3502	1.08533
024-ZR19	0.200428	7.56298	0.000210573	0.335975	7794.33	14.7355	0.0491208	1.40931	0.0993058	1.54298	0.0146614	0.507287	0.328771	153.599	65.3575	93.8274	0.945019	96.1353	2.82861	38.9141	2.40077	93.8274	0.945019
012-ZR10	0.206759	7.39904	0.000184814	0.218349	7555.66	12.9131	0.0494682	1.30385	0.100453	1.46187	0.0147267	0.547493	0.374516	170.082	60.3294	94.242	1.02439	97.1948	2.70815	44.5904	3.03803	94.242	1.02439
035-ZR27	0.0837262	21.175	0.000759467	0.325895	18654.4	23.0533	0.0479875	1.66824	0.142763	1.87445	0.0215751	0.770218	0.410903	98.655	78.0096	137.603	2.09705	135.502	4.7499	-39.4788	-1.55067	137.603	2.09705
121-ZR91	0.177063	11.6001	0.000230718	0.410301	8820.4	15.4252	0.0497611	1.09081	0.160141	1.29343	0.0233388	0.588039	0.454637	183.848	50.4211	148.723	1.72896	150.827	3.62248	19.1053	1.39476	148.723	1.72896
030-ZR23N	0.0499411	17.7878	0.00120385	0.254012	31258.7	22.7224	0.0525342	0.752407	0.262795	1.04421	0.0362778	0.622069	0.59573	308.731	34.0857	229.72	2.8074	236.917	4.4082	25.5923	3.03779	229.72	2.8074
084-ZR65	0.0629763	8.47695	0.000569833	0.277469	24787.4	10.6366	0.0514134	0.822149	0.266647	1.05076	0.037612	0.539326	0.513272	259.409	37.557	238.014	2.52028	240.01	4.48709	8.24775	0.831431	238.014	2.52028
116-ZR87	0.0781463	7.69652	0.000535557	0.329731	19975.4	13.3897	0.0510206	0.761455	0.266061	0.991676	0.0378183	0.516057	0.520389	241.758	34.91	239.295	2.42429	239.539	4.22769	1.01888	0.101826	239.295	2.42429
068-ZR52	0.0336524	9.08424	0.00103412	0.343606	46386.2	28.0875	0.0518698	0.790448	0.270982	1.01981	0.0378871	0.527171	0.516931	279.674	35.9857	239.723	2.48085	243.478	4.4107	14.285	1.54236	239.723	2.48085
110-ZR84N	0.0523827	9.02352	0.000709932	0.476829	29799.8	12.8344	0.0505369	0.82732	0.264992	1.04495	0.0380268	0.519769	0.497413	219.763	38.0633	240.59	2.4547	238.681	4.44041	-9.47703	-0.799772	240.59	2.4547
023-ZR18	0.0133806	6.69794	0.000707835	0.327306	116660	57.8111	0.0511801	0.625352	0.26902	0.866283	0.0381197	0.471263	0.544006	248.951	28.6604	241.168	2.23088	241.91	3.72596	3.12659	0.306955	241.168	2.23088
042-ZR32	0.161914	11.6289	0.000273208	0.410237	9640.75	16.7781	0.0514682	2.05262	0.272633	2.18624	0.0384154	0.655066	0.299631	261.856	92.9259	243.003	3.12403	244.796	9.48895	7.19989	0.732595	243.003	3.12403
132-ZR100	0.0941847	12.4102	0.000431636	0.392	16573.5	18.3501	0.0490975	1.14305	0.260399	1.30414	0.0384632	0.506885	0.388673	152.488	53.12	243.3	2.42031	234.988	5.46425	-59.5532	-3.53725	243.3	2.42031
117-ZR88	0.396069	17.7831	0.000158885	0.536088	3941.14	23.4891	0.050773	0.874636	0.270688	1.12902	0.0386635	0.610244	0.540509	230.539	40.1484	244.543	2.92839	243.243	4.87829	-6.07451	-0.53451	244.543	2.92839
056-ZR44	0.0620702	8.96516	0.000505474	0.244023	25148.2	20.2937	0.050779	0.789619	0.271259	1.03091	0.0387406	0.549539	0.53306	230.81	36.2658	245.022	2.64217	243.7	4.46226	-6.15744	-0.542482	245.022	2.64217
019-ZR14	0.0610057	11.7178	0.00072345	0.687337	25587.1	16.2435	0.0514749	0.619422	0.275044	0.862657	0.0387501	0.472441	0.547658	262.155	28.3224	245.081	2.27206	246.719	3.77547	6.51317	0.663847	245.081	2.27206
081-ZR62B	0.0731345	7.17078	0.000481078	0.30322	21343.6	10.2426	0.0516864	1.09341	0.27654	1.28431	0.0388015	0.562686	0.438124	271.56	49.7451	245.4	2.70947	247.909	5.64221	9.63349	1.01232	245.4	2.70947
083-ZR64	0.0757321	9.83821	0.000484621	0.199554	20611.3	12.7037	0.0510662	0.927845	0.275526	1.14209	0.0391286	0.553338	0.484496	243.82	42.473	247.429	2.68608	247.102	5.00378	-1.48014	-0.132505	247.429	2.68608
080-ZR62N	0.066103	10.2529	0.000706862	0.284445	23613.6	15.2065	0.0517295	0.715114	0.279727	1.01578	0.0392158	0.618981	0.609362	273.472	32.6095	247.97	3.01114	250.441	4.50398	9.3252	0.986326	247.97	3.01114
065-ZR49	0.0748741	10.4186	0.000735659	0.2015	20847	19.6046	0.0505922	0.577274	0.27752	0.973082	0.0397811	0.690182	0.709274	222.294	26.5938	251.476	3.404	248.688	4.28822	-13.1275	-1.12091	251.476	3.404
070-ZR54	0.0881324	10.4048	0.000453197	0.448268	17710.7	12.9474	0.0529499	0.843926	0.292186	1.08123	0.0400184	0.565288	0.52282	326.652	38.0858	252.947	2.80407	260.278	4.95885	22.5637	2.81673	252.947	2.80407
113-ZR84B	0.0734016	18.67	0.000857396	0.363043	21265	19.9908	0.0520223	0.651394	0.287136	0.973768	0.0400281	0.621785	0.638535	286.388	29.6484	253.007	3.08501	256.303	4.40664	11.6559	1.28584	253.007	3.08501
091-ZR69	0.135222	9.20471	0.000303343	0.425078	11542.9	12.7039	0.0526809	1.13732	0.293972	1.33751	0.0404687	0.598468	0.447448	315.077	51.327	255.737	3.00074	261.681	6.16141	18.8333	2.27131	255.737	3.00074
031-ZR23B	0.0330108	17.583	0.00177652	0.564747	47283	19.0028	0.0524328	0.55472	0.293934	0.805643	0.0406549	0.451722	0.560698	304.329	25.1845	256.891	2.27503	261.651	3.71315	15.5876	1.81919	256.891	2.27503
069-ZR53	0.11979	12.803	0.000503151	0.611482	13029.8	20.0234	0.0523968	0.925131	0.295603	1.15662	0.0409139	0.587032	0.507542	302.764	41.9045	258.495	2.97451	262.96	5.35198	14.6216	1.698	258.495	2.97451
054-ZR42	0.00953502	11.6274	0.00120119	0.653203	163694	77.023	0.0523546	0.556916	0.296803	0.825583	0.041113	0.483879	0.586106	300.93	25.2992	259.728	2.46335	263.9	3.83359	13.6915	1.58085	259.728	2.46335
125-ZR93	0.097877	14.0405	0.000544641	0.504784	15946.7	16.6729	0.0510981	1.15438	0.291219	1.32643	0.0413315	0.538087	0.405665	245.258	52.7453	261.081	2.75325	259.519	6.06619	-6.45173	-0.60207	261.081	2.75325
027-ZR20	0.0523912	11.7237	0.000764214	0.301717	29791.5	14.4319	0.0516159	0.692241	0.294219	0.948287	0.0413383	0.53175	0.560748	268.433	31.6001	261.123	2.72126	261.875	4.37315	2.72305	0.286982	261.123	2.72126
089-ZR67	0.141573	9.33459	0.000335757	0.990127	11024.6	15.5507	0.0527229	0.998229	0.302576	1.21303	0.0416199	0.581113	0.479058	316.892	45.0791	262.866	2.9933	268.41	5.71416	17.0486	2.06556	262.866	2.9933
039-ZR29	0.0545096	15.0559	0.000764239	0.629021	28633.3	49.5802	0.0517414	0.436065	0.29802	0.821777	0.0417708	0.589807	0.717721	273.996	19.9219	263.8	3.04865	264.852	3.82797	3.72125	0.397242	263.8	3.04865
090-ZR68	0.0309502	17.5159	0.00138276	0.945086	50428.9	20.418	0.0518352	0.818157	0.298955	1.06103	0.0418261	0.564897	0.532405	278.146	37.2502	264.142	2.92362	265.584	4.95301	5.03452	0.542794	264.142	2.92362
059-ZR47	0.0473401	16.6194	0.00125522	0.33637	32969.4	20.853	0.0510023	0.778796	0.295326	1.05705	0.0419932	0.611184	0.578196	240.933	35.706	265.176	3.17527	262.743	4.88829	-10.0621	-0.925836	265.176	3.17527
008-ZR6	0.211198	14.5722	0.000276516	0.569342	7389.99	18.7157	0.0512861	0.828183	0.300355	1.11295	0.0424719	0.644571	0.579157	253.708	37.8699	268.137	3.38532	266.678	5.21375	-5.68733	-0.547231	268.137	3.38532
045-ZR35	0.56962	13.6353	9.96533e-05	0.391755	2739.98	23.5079	0.0526261	2.38607	0.30842	2.59977	0.0425018	0.963421	0.37058	312.711	106.804	268.322	5.06302	272.955	12.4069	14.195	1.69767	268.322	5.06302
053-ZR41	0.0436385	13.4353	0.000851648	0.296747	35762.9	19.826	0.0525704	0.75798	0.322221	0.993673	0.0444507	0.524937	0.52828	310.298	34.3272	280.362	2.88004	283.61	4.91165	9.64769	1.14513	280.362	2.88004
009-ZR7	0.106638	10.8237	0.000526437	0.383318	14634.8	17.4562	0.0523094	0.652238	0.322248	0.958583	0.0446763	0.596803	0.622589	298.958	29.62	281.754	3.29018	283.63	4.73871	5.75463	0.661657	281.754	3.29018
041-ZR31	0.0617329	16.5665	0.00108788	0.373155	25279.4	20.2846	0.0518721	0.747056	0.32658	0.989531	0.0456585	0.532715	0.538351	279.774	34.02	287.812	2.99864	286.951	4.94102	-2.8729	-0.299968	287.812	2.99864
096-ZR73	0.0599496	11.1446	0.000666735	0.197562	26031	16.0225	0.0530014	0.979279	0.336542	1.18964	0.0460488	0.564759	0.474732	328.856	44.1354	290.218	3.20497	294.548	6.07409	11.7494	1.47022	290.218	3.20497
104-ZR79	0.0343494	9.62423	0.00113802	0.317508	45429.7	13.3973	0.0508738	1.26278	0.331062	1.48232	0.0471934	0.682174	0.460207	235.116	57.7601	297.267	3.96306	290.376	7.47331	-26.4344	-2.37321	297.267	3.96306
006-ZR4	0.0104855	15.5925	0.00139227	0.420309	148813	78.3453	0.0540014	0.771365	0.363408	1.00045	0.048804	0.51827	0.518037	371.109	34.5565	307.175	3.10895	314.756	5.40811	17.228	2.40866	307.175	3.10895
018-ZR13	0.0589804	9.11763	0.000779778	0.263421	26447.4	14.7452	0.0541097	0.654531	0.428371	0.934186	0.057413	0.554075	0.593111	375.619	29.3229	359.874	3.87809	362.019	5.68151	4.19195	0.592623	359.874	3.87809
057-ZR45	0.0482232	14.2575	0.00103965	0.224221	32334.9	15.6165	0.0555186	0.643458	0.512185	0.954961	0.0669044	0.600517	0.628839	433.169	28.5409	417.479	4.85424	419.918	6.55793	3.62229	0.580862	417.479	4.85424
066-ZR50	0.0488729	7.84168	0.000807554	0.707977	31898.5	12.1282	0.0565301	0.604238	0.560565	0.919521	0.0719139	0.585766	0.637034	473.248	26.6236	447.676	5.0657	451.894	6.69652	5.40362	0.933505	447.676	5.0657
040-ZR30	0.0166201	9.21684	0.00251512	0.481837	93791	14.1942	0.0563962	0.393656	0.57779	0.751064	0.0742995	0.521382	0.694191	468.001	17.3859	462.007	4.64822	463.04	5.57777	1.28076	0.223097	462.007	4.64822
086-ZR66B	0.0196959	10.3247	0.00197141	0.058952	79136.3	14.3669	0.0566593	0.451193	0.599004	0.74505	0.07667	0.462851	0.621235	478.295	19.8838	476.215	4.24875	476.602	5.66005	0.434851	0.0810494	476.215	4.24875
107-ZR81	0.0221306	11.846	0.00212045	0.359612	70425.7	15.8666	0.056844	0.491905	0.612212	0.763601	0.0781059	0.451468	0.591235	485.485	21.6452	484.807	4.21625	484.954	5.88	0.139526	0.0303581	484.807	4.21625
131-ZR99	0.0470695	12.5033	0.000679116	1.23791	33106.6	25.9408	0.0573103	0.856826	0.646408	1.06394	0.0817976	0.510415	0.479741	503.492	37.493	506.843	4.97488	506.266	8.46527	-0.665552	-0.114074	506.843	4.97488
058-ZR46	0.00707357	16.4571	0.00405927	0.124388	220285	48.8022	0.0578522	0.480749	0.665492	0.804195	0.0834236	0.527558	0.656007	524.168	21.0165	516.526	5.23625	517.968	6.51515	1.45804	0.27838	516.526	5.23625
085-ZR66N	0.0517822	17.624	0.00105035	0.404224	30088.1	20.5259	0.0589089	1.16603	0.698003	1.34844	0.0859295	0.566889	0.420404	563.731	50.3991	531.419	5.78215	537.597	11.2256	5.73197	1.14934	531.419	5.78215
011-ZR9B	0.0570674	11.0287	0.000695058	0.410914	27300.1	13.2887	0.0591117	0.789589	0.710246	1.21743	0.0871367	0.849349	0.697657	571.214	34.1723	538.581	8.77412	544.893	10.2414	5.71292	1.15828	538.581	8.77412
055-ZR43	0.131108	13.0026	0.000411015	0.245177	11882.2	19.9002	0.0588908	0.851228	0.718496	1.21814	0.0884797	0.788661	0.64743	563.06	36.8751	546.539	8.26272	549.779	10.3164	2.93404	0.589212	546.539	8.26272
060-ZR48	0.0496475	10.1899	0.000888207	0.225006	31378.1	13.5076	0.05907	0.803907	0.721342	1.06719	0.0885607	0.596102	0.558571	569.676	34.7976	547.019	6.25103	551.459	9.06165	3.9771	0.805133	547.019	6.25103
079-ZR61	0.0219512	10.4512	0.00215308	0.261425	70944.2	19.8825	0.0593415	0.483364	0.785429	0.909114	0.0959875	0.674948	0.742424	579.648	20.9331	590.851	7.61903	588.576	8.10542	-1.93276	-0.386581	590.851	7.61903
109-ZR83	0.0168213	10.1746	0.00256485	0.259668	92501.3	16.0614	0.0644343	0.396894	1.00537	0.738617	0.113155	0.500737	0.677938	755.917	16.7061	691.046	6.56094	706.532	7.50598	8.58184	2.19182	691.046	6.56094
115-ZR86	0.0270749	9.53526	0.00186935	0.256527	57429.8	18.8975	0.0645224	0.556521	1.12499	0.843696	0.126446	0.514602	0.609937	758.8	23.3893	767.558	7.44541	765.363	9.05044	-1.15422	-0.286853	767.558	7.44541
036-ZR28	0.0173131	12.935	0.00319816	0.266954	89665.4	18.0678	0.0724145	0.437985	1.5402	0.801066	0.154247	0.559092	0.697934	997.612	17.7451	924.727	9.62913	946.582	9.83976	7.30599	2.30887	924.727	9.62913
028-ZR21	0.00852189	13.4781	0.00585221	0.118477	182160	16.2938	0.0703973	0.319448	1.50162	0.670229	0.154692	0.458112	0.683516	939.965	13.0676	927.213	7.91023	931.042	8.15359	1.35658	0.41126	927.213	7.91023
097-ZR74	0.0193179	13.3648	0.00123715	0.19145	80334.4	53.5781	0.0716716	0.403693	1.57405	0.796592	0.159271	0.578185	0.725823	976.631	16.4119	952.726	10.2375	960.025	9.86829	2.44776	0.760333	952.726	10.2375
052-ZR40	0.0376911	14.4209	0.00128616	0.216471	41170.7	17.0722	0.0732435	0.453943	1.62151	0.921168	0.160552	0.71077	0.771596	1020.7	18.3254	959.845	12.6711	978.575	11.5381	5.96182	1.91403	959.845	12.6711
072-ZR56	0.00557016	11.042	0.0090694	0.176872	278519	15.3338	0.0739947	0.375991	1.67639	0.817238	0.164301	0.623872	0.76339	1041.32	15.139	980.637	11.3456	999.614	10.3687	5.82791	1.89851	980.637	11.3456
047-ZR37	0.182492	14.8461	0.000276013	0.645279	8500.71	27.306	0.0711686	0.99279	1.6202	1.37937	0.165099	0.883027	0.640167	962.261	40.2952	985.052	16.1225	978.067	17.2476	-2.36848	-0.714211	985.052	16.1225
020-ZR15	0.0130834	12.5774	0.00359862	0.202849	118529	18.9396	0.0738464	0.281895	1.73516	0.642569	0.170403	0.442874	0.689224	1037.27	11.3642	1014.33	8.31055	1021.67	8.26139	2.21185	0.718307	1037.27	11.3642
103-ZR78	0.00807791	8.92391	0.00544105	0.236498	191970	14.9728	0.0740985	0.202754	1.74591	0.612249	0.170875	0.443223	0.723926	1044.15	8.16946	1016.93	8.33678	1025.65	7.89005	2.60691	0.850226	1044.15	8.16946
007-ZR5	0.0377852	8.38079	0.000975397	0.254199	41037.4	12.2885	0.0745889	0.622059	1.76859	0.892149	0.171957	0.521229	0.58424	1057.45	24.9464	1022.89	9.85643	1034	11.5407	3.26823	1.07538	1057.45	24.9464
022-ZR17	0.0366589	8.59821	0.00103916	0.296915	42297.3	11.4672	0.0741262	0.551021	1.76042	0.89884	0.172231	0.605803	0.673983	1044.91	22.1493	1024.39	11.4705	1031	11.6076	1.96336	0.641339	1044.91	22.1493
114-ZR85	0.124055	12.0296	0.000402465	0.427507	12498.1	17.1692	0.0751925	0.837746	1.79724	1.1307	0.17334	0.662855	0.586233	1073.65	33.4681	1030.49	12.6191	1044.46	14.6998	4.02048	1.33767	1073.65	33.4681
033-ZR25	0.321241	13.9219	0.000166121	0.383281	4825.07	27.769	0.071708	1.29536	1.75547	2.52616	0.177538	2.13688	0.845899	977.663	52.3491	1053.51	41.4711	1029.18	32.4225	-7.75815	-2.36423	977.663	52.3491
126-ZR94	0.00538568	18.1359	0.012177	0.00595973	287789	19.6551	0.0783937	0.265694	1.9262	0.653878	0.178191	0.468689	0.716785	1156.87	10.5235	1057.09	9.13588	1090.22	8.7221	8.62511	3.03932	1156.87	10.5235
127-ZR95	0.0371973	12.483	0.00123768	0.364374	41664.3	15.8636	0.0752133	0.422856	1.86157	0.847821	0.179495	0.634587	0.748492	1074.21	16.9371	1064.21	12.4447	1067.54	11.1698	0.930328	0.312056	1074.21	16.9371
120-ZR90	0.0151879	14.6841	0.00236263	0.298879	102027	24.859	0.0772081	0.41623	1.93305	0.746588	0.181571	0.496843	0.665485	1126.57	16.5434	1075.55	9.83986	1092.6	9.96778	4.52859	1.55998	1126.57	16.5434
021-ZR16	0.00996283	12.4646	0.00440211	0.19547	155519	16.8414	0.0751221	0.293375	1.89661	0.740578	0.183095	0.57017	0.769899	1071.77	11.765	1083.86	11.3715	1079.9	9.82353	-1.12791	-0.366551	1071.77	11.765
082-ZR63	0.0116454	14.3851	0.00430694	0.311602	133048	16.59	0.0758431	0.369057	1.91666	0.719106	0.183271	0.493576	0.686374	1090.93	14.7506	1084.82	9.85249	1086.9	9.57387	0.560124	0.191684	1090.93	14.7506
067-ZR51	0.0254177	9.01735	0.00122864	0.2303	60947.3	14.1594	0.0774128	0.557523	1.98038	0.936696	0.185525	0.655191	0.69947	1131.84	22.1219	1097.09	13.2125	1108.85	12.6005	3.07081	1.06086	1131.84	22.1219
102-ZR77	0.00813474	7.30206	0.000822335	0.38666	190400	83.9198	0.0770304	0.625433	1.99777	0.921781	0.188083	0.566764	0.614857	1121.98	24.8417	1110.98	11.5627	1114.76	12.4367	0.980032	0.3387	1121.98	24.8417
101-ZR76	0.0229245	8.5578	0.0015015	0.190611	67556.4	12.4514	0.0770156	0.507154	2.01206	0.825107	0.189465	0.535074	0.64849	1121.59	20.1602	1118.48	10.9838	1119.59	11.1623	0.278013	0.0992313	1121.59	20.1602
048-ZR38	0.0305197	17.3485	0.0018801	0.3221	50721.4	18.5108	0.0773535	0.457902	2.08515	0.77945	0.195489	0.510466	0.654905	1130.32	18.1848	1151.04	10.7575	1143.93	10.6701	-1.8336	-0.621811	1130.32	18.1848
032-ZR24	0.0373297	10.9005	0.00126634	0.234958	41467.1	15.873	0.0798768	0.559017	2.15767	0.855783	0.195898	0.531574	0.621156	1193.95	21.9808	1153.25	11.2217	1167.52	11.8406	3.40902	1.22271	1193.95	21.9808
034-ZR26	0.024482	14.6797	0.00229463	0.442291	63228.3	19.1514	0.0791058	0.40929	2.13696	0.712534	0.195909	0.450437	0.632163	1174.78	16.1538	1153.31	9.50996	1160.84	9.83334	1.82827	0.649149	1174.78	16.1538
092-ZR70	0.0364891	17.345	0.00137399	0.375692	42413.9	16.4484	0.079855	0.498943	2.18604	0.871078	0.198528	0.610361	0.700696	1193.41	19.6277	1167.41	13.0283	1176.6	12.1012	2.17873	0.781566	1193.41	19.6277
071-ZR55	0.0209565	8.49347	0.00139148	0.354249	73837.8	32.1201	0.0810424	0.457647	2.24373	0.796133	0.200781	0.535811	0.673017	1222.47	17.9326	1179.52	11.5458	1194.82	11.1527	3.51394	1.28117	1222.47	17.9326
046-ZR36	0.012122	13.0892	0.00380446	0.305696	127644	16.2196	0.0800728	0.359245	2.22437	0.730034	0.201459	0.516333	0.707273	1198.78	14.1339	1183.16	11.1575	1188.75	10.2017	1.30337	0.470259	1198.78	14.1339
029-ZR22	0.0796432	13.1469	0.00064666	0.376092	19425.2	16.6668	0.078353	0.714713	2.19574	1.01851	0.203232	0.623895	0.61256	1155.84	28.2309	1192.66	13.5792	1179.69	14.1618	-3.18555	-1.09916	1155.84	28.2309
005-ZR3	0.0256985	9.13798	0.00166129	0.278288	60195.7	13.7994	0.0805347	0.384373	2.27026	0.734772	0.204436	0.504831	0.687058	1210.11	15.0953	1199.11	11.0429	1203.1	10.3324	0.909289	0.331357	1210.11	15.0953
017-ZR12	0.0455141	10.5977	0.00115212	0.226207	33984.5	17.3982	0.0809289	0.361676	2.29654	0.726302	0.205796	0.509325	0.701258	1219.72	14.1864	1206.38	11.2026	1211.22	10.2494	1.0935	0.399839	1219.72	14.1864
044-ZR34	0.0336234	11.8779	0.00124202	0.205608	45999.3	14.8036	0.0804591	0.482051	2.29405	0.817332	0.206773	0.546228	0.668306	1208.26	18.9246	1211.6	12.0611	1210.46	11.5265	-0.276459	-0.0947688	1208.26	18.9246
129-ZR97	0.0501413	30.3708	0.00146773	0.155854	30828.3	37.2666	0.0790544	0.986195	2.33137	1.32788	0.213871	0.808323	0.608733	1173.5	38.7869	1249.41	18.3486	1221.9	18.7844	-6.46857	-2.2515	1173.5	38.7869
105-ZR80N	0.00852442	8.66319	0.00368943	0.214781	181298	23.4083	0.0845123	0.354195	2.52073	0.837	0.216308	0.661682	0.79054	1304.37	13.7272	1262.34	15.1625	1278.03	12.1334	3.22256	1.22793	1304.37	13.7272
078-ZR60	0.0590383	16.9874	0.000949752	0.517636	26162.7	19.9317	0.0855217	1.01826	2.62881	1.33261	0.22292	0.775685	0.582081	1327.39	39.172	1297.29	18.2171	1308.73	19.5105	2.26822	0.874614	1327.39	39.172
016-ZR11	0.0252861	11.5356	0.00173283	0.447863	61077.1	19.1664	0.0853552	0.296135	2.64121	0.73207	0.224409	0.557618	0.7617	1323.62	11.4503	1305.13	13.1697	1312.2	10.7552	1.39702	0.538651	1323.62	11.4503
128-ZR96	0.0130783	11.5717	0.00343779	0.247213	118085	16.8476	0.0855985	0.271888	2.65298	0.66002	0.224768	0.47372	0.717736	1329.13	10.5063	1307.02	11.2037	1315.47	9.71103	1.66349	0.642593	1329.13	10.5063
118-ZR89N	0.0267291	8.98518	0.00154553	0.792816	57751.9	13.3858	0.0870962	0.419186	2.76236	0.806933	0.23001	0.581491	0.720618	1362.62	16.1077	1334.55	14.0118	1345.43	11.9959	2.06016	0.808459	1362.62	16.1077
073-ZR57	0.0240907	12.8219	0.00202618	0.316725	64060.9	15.8022	0.0875198	0.536183	2.80953	0.868149	0.232805	0.573496	0.660596	1371.97	20.5617	1349.19	13.9554	1358.08	12.9607	1.6604	0.654963	1371.97	20.5617
119-ZR89B	0.0140702	11.8766	0.00273607	0.449537	109672	12.2639	0.087331	0.32542	2.81832	0.702295	0.234039	0.500028	0.711991	1367.81	12.5031	1355.63	12.2207	1360.42	10.4996	0.890053	0.351945	1367.81	12.5031
043-ZR33	0.0103147	9.93181	0.00432123	0.754225	149552	15.172	0.0879242	0.31024	2.88227	0.722142	0.237735	0.536607	0.743077	1380.83	11.8996	1374.91	13.2815	1377.29	10.8585	0.428653	0.172564	1380.83	11.8996
004-ZR2	0.0300285	11.1917	0.00130603	0.26148	51370.6	14.1912	0.0879019	0.44092	2.88202	0.74249	0.237774	0.468602	0.631122	1380.34	16.8992	1375.12	11.6006	1377.22	11.1634	0.3786	0.152849	1380.34	16.8992
051-ZR39	0.0264725	12.848	0.00149701	0.255869	58270.6	12.9591	0.0882757	0.448726	2.89559	0.881189	0.237882	0.661699	0.750916	1388.49	17.1782	1375.68	16.3838	1380.76	13.2579	0.922927	0.368373	1388.49	17.1782
098-ZR75	0.00838985	11.206	0.00551354	0.372475	181337	19.1018	0.119485	0.358105	5.84566	0.720811	0.354803	0.504021	0.699241	1948.53	12.7717	1957.49	17.0067	1953.21	12.4614	-0.459811	-0.21942	1948.53	12.7717
122-ZR92	0.0194112	22.8101	0.00332091	0.465649	76461.8	20.2058	0.17764	0.332357	11.799	0.764447	0.481695	0.580194	0.758972	2630.96	11.0257	2534.64	24.2955	2588.59	14.261	3.66068	2.08379	2630.96	11.0257
Data not used in the frequency histogram due to the high degree of discordance
003-ZR1	0.117333	26.1249	0.000712914	0.279194	13303.5	22.0377	0.0589447	0.850292	0.316207	1.03863	0.0389039	0.467393	0.450011	565.053	36.8224	246.035	2.25637	278.981	5.06087	56.458	11.8092
074-ZR58	0.250182	22.1553	0.000410265	0.289524	6239.24	24.5778	0.0602807	1.08213	0.323546	1.29169	0.0389246	0.60014	0.464615	613.664	46.41	246.164	2.89863	284.627	6.40223	59.8863	13.5135
077-ZR59	0.0428684	3.53787	0.000734883	0.268708	36416.7	13.6193	0.0584238	1.00372	0.286959	1.54044	0.0356202	1.10824	0.719432	545.69	43.5638	225.628	4.91356	256.163	6.96331	58.6528	11.9203
095-ZR72	0.0314856	9.71428	0.00171808	0.221779	49108	20.1117	0.0890772	0.450516	2.58534	1.27969	0.210483	1.13901	0.890069	1405.82	17.2055	1231.39	25.5096	1296.5	18.6533	12.4076	5.02155
106-ZR80B	0.0122774	11.6635	0.00385553	0.0826094	126539	14.7657	0.0762443	0.357118	1.48856	0.861196	0.141588	0.69053	0.801827	1101.49	14.2521	853.634	11.0373	925.729	10.4343	22.5021	7.78798
108-ZR82	0.0473869	8.59502	0.000701944	0.253436	32542.8	12.2699	0.0789823	0.691901	2.62654	1.10147	0.241168	0.7728	0.701607	1171.69	27.2707	1392.77	19.3455	1308.1	16.1361	-18.8682	-6.47288
Data discarded due to high analytical error
010-ZR8	0.272257	13.5358	0.00021314	0.661974	5733.57	25.2763	0.0520737	4.28528	0.27159	4.35829	0.0378235	0.702649	0.161222	288.646	190.161	239.328	3.30118	243.964	18.816	17.0861	1.9004
093-ZR71N	0.279831	8.15936	0.000151149	0.370595	5582.12	19.7984	0.03974	11.1007	0.0971445	11.1576	0.0177278	1.06213	0.0951936	-367.824	531.169	113.28	2.38512	94.137	19.964	130.797	-20.3351
094-ZR71B	0.377711	15.598	0.000169678	0.441168	4135.58	21.7919	0.0531173	4.58952	0.129663	4.64545	0.017703	0.61581	0.132562	333.811	201.644	113.123	1.38101	123.795	10.7994	66.1117	8.62113
Data discarded due to the high 204Pb
015-ZR9N	1.5227	481.633	0.00622157	0.0534508	1022.86	13.701	0.0619944	1.22471	0.796518	1.45894	0.0931771	0.700926	0.480435	673.916	51.955	574.3	7.70033	594.863	13.0937	14.7817	3.45674

## Sheet: Sample PGZ01
Sample PGZ01 (32.914317°S - 69.964133°W)
Laboratory of geochronology and Isotope Geochemistry (Brasilia, Brasil)
Identifier	206* (%)	204Pb cps	206Pb mV1	Th/U	206Pb/204Pb	1s%	207Pb/206Pb	1s %	207Pb/235U	1s %	206Pb/238U	1s %	Rho	207Pb/206Pb	2s abs	206Pb/238U	2s abs	207Pb/235U	2s abs	% U-Pb disc5	% U-Pb disc6	Best Age7	2s abs
083-ZR61	0.70332	13.0502	6.05426e-05	0.410121	2220.57	14.9096	0.0514894	2.23649	0.165292	2.40966	0.0232809	0.816872	0.338999	262.8	101.104	148.358	2.39589	155.325	6.92933	43.5471	4.48526	148.358	2.39589
081-ZR59	0.354247	5.63218	9.8396e-05	0.522837	4408.68	10.9235	0.0513869	2.34209	0.166771	2.43566	0.023536	0.55653	0.228493	258.225	105.888	149.965	1.64983	156.613	7.05758	41.9247	4.24455	149.965	1.64983
117-ZR88	0.491416	11.3735	0.000101321	0.33721	3178.05	15.738	0.0520628	1.65747	0.170953	1.84844	0.023813	0.729525	0.394672	288.169	74.8898	151.709	2.18749	160.245	5.47288	47.3541	5.32686	151.709	2.18749
082-ZR60	0.140379	5.67578	0.000280659	0.456476	11125.2	14.5431	0.0495272	1.37401	0.163128	1.51907	0.0238864	0.531394	0.349815	172.866	63.5121	152.172	1.59822	153.438	4.32193	11.9712	0.825187	152.172	1.59822
056-ZR39	0.0783687	9.73166	0.000492461	1.03284	19928.1	17.2705	0.0484853	1.26134	0.160262	1.44353	0.023971	0.596228	0.413035	123.018	58.8869	152.704	1.7994	150.933	4.04508	-24.1318	-1.17374	152.704	1.7994
049-ZR36	0.0621285	13.3646	0.000529115	0.416331	25137.2	27.0502	0.0521108	1.06361	0.172935	1.2402	0.024067	0.519182	0.418626	290.273	48.2378	153.308	1.57302	161.963	3.70993	47.1848	5.34361	153.308	1.57302
107-ZR80	0.326506	11.8654	0.000139129	0.490062	4783.13	14.8703	0.0518891	1.31099	0.173902	1.48408	0.0243049	0.588647	0.39664	280.525	59.4585	154.806	1.80069	162.8	4.45978	44.8156	4.91009	154.806	1.80069
116-ZR87	0.072259	12.3607	0.000637661	0.4733	21612.7	14.26	0.0497012	0.657294	0.167421	0.913857	0.0244292	0.515565	0.564164	181.042	30.4913	155.588	1.58502	157.179	2.65973	14.0594	1.01175	155.588	1.58502
079-ZR57	0.199902	11.0567	0.000250776	0.894666	7812.38	16.6213	0.0497505	1.18124	0.167773	1.38174	0.0244563	0.613649	0.444115	183.355	54.5713	155.759	1.88857	157.485	4.02734	15.0508	1.09601	155.759	1.88857
131-ZR100	0.2954	11.8994	0.000187045	0.414067	5286.7	18.6493	0.0514165	1.14741	0.176227	1.31679	0.0248563	0.529258	0.401929	259.546	52.2947	158.275	1.65486	164.809	4.0025	39.0186	3.96451	158.275	1.65486
019-ZR14	0.12588	6.98993	0.000263952	0.423619	12406.1	10.3581	0.0551332	1.35097	0.190387	1.50218	0.0250433	0.542331	0.361031	417.627	59.7934	159.451	1.70818	176.96	4.87314	61.8198	9.89415	159.451	1.70818
098-ZR73	0.0700296	12.181	0.00064766	0.968969	22299	14.7565	0.0498559	0.861938	0.184571	1.06759	0.026848	0.50942	0.47717	188.281	39.874	170.791	1.71712	171.986	3.37523	9.2891	0.694888	170.791	1.71712
043-ZR31	0.0955059	9.30649	0.000383762	0.875469	16349.7	13.6703	0.0501511	1.10141	0.198781	1.30502	0.0287449	0.59387	0.455066	202.001	50.7393	182.688	2.13923	184.094	4.38979	9.56052	0.763716	182.688	2.13923
045-ZR33	0.0927969	15.4917	0.000630842	0.544292	16826.9	23.3033	0.0502481	1.01159	0.199713	1.23754	0.0288239	0.609006	0.492112	206.484	46.593	183.183	2.1996	184.883	4.17926	11.2848	0.919463	183.183	2.1996
050-ZR37	0.0749502	9.43329	0.00042974	0.42778	20833.7	30.4503	0.0509453	0.910613	0.202509	1.13068	0.0288274	0.558514	0.493961	238.355	41.7303	183.205	2.01749	187.247	3.86317	23.1375	2.15831	183.205	2.01749
124-ZR95	0.0540552	11.1767	0.000522924	0.430554	28886.2	30.868	0.0505509	0.722276	0.205819	0.934513	0.0295272	0.462969	0.495411	220.405	33.2512	187.589	1.71181	190.038	3.2367	14.8893	1.28895	187.589	1.71181
086-ZR64	0.178438	7.46848	0.000230088	0.946204	8749.17	13.4056	0.0518187	1.10214	0.246686	1.32513	0.0345243	0.635591	0.479643	277.417	50.0868	218.802	2.73441	223.881	5.31788	21.1287	2.26844	218.802	2.73441
034-ZR25	0.0511297	15.0698	0.00107839	0.822168	30533.5	18.7246	0.0514455	0.505785	0.246789	0.791954	0.0347892	0.483817	0.610916	260.842	23.1504	220.453	2.09695	223.965	3.18092	15.4841	1.56798	220.453	2.09695
088-ZR66	0.134831	11.0167	0.000310291	0.748666	11578.5	14.8182	0.0520837	1.31335	0.253281	1.47873	0.0352668	0.569634	0.385217	289.085	59.4733	223.428	2.50159	229.238	6.05976	22.7121	2.53446	223.428	2.50159
129-ZR98	0.133314	15.9973	0.000482472	0.870605	11710.2	22.2734	0.0513095	1.01123	0.250692	1.21758	0.0354331	0.56799	0.466493	254.761	46.1719	224.463	2.50573	227.138	4.95014	11.8926	1.17798	224.463	2.50573
106-ZR79	0.19645	11.8977	0.000208552	0.810251	7946.72	24.5365	0.051671	1.21759	0.252695	1.51394	0.0354663	0.819879	0.541552	270.876	55.3537	224.67	3.62007	228.763	6.19239	17.058	1.78931	224.67	3.62007
087-ZR65	0.0104078	7.69099	0.000806926	0.433877	149997	76.7871	0.0511614	0.754792	0.250596	1.04135	0.035522	0.614331	0.589938	248.109	34.5666	225.017	2.71671	227.06	4.23312	9.30749	0.900109	225.017	2.71671
104-ZR77	0.0681038	12.6997	0.000680107	0.629523	22922.8	15.4746	0.0519992	0.910817	0.254954	1.07715	0.0355575	0.439733	0.408238	285.373	41.3885	225.237	1.94653	230.592	4.43909	21.0726	2.32224	225.237	1.94653
099-ZR74	0.0580047	16.1854	0.00102462	1.04655	26913.8	22.0672	0.049491	1.38914	0.242932	1.52029	0.0355979	0.494219	0.325083	171.159	64.2249	225.489	2.1901	220.819	6.02529	-31.7423	-2.11497	225.489	2.1901
047-ZR34B	0.0393725	9.2181	0.00104715	0.495603	39650	13.3284	0.0509878	0.625483	0.251013	0.880755	0.0357023	0.4972	0.564515	240.276	28.7113	226.139	2.20955	227.399	3.58563	5.88387	0.55409	226.139	2.20955
121-ZR92	0.0557262	14.4457	0.000658631	0.766649	28014.1	42.0675	0.0517141	0.959455	0.2553	1.26057	0.035802	0.728827	0.578173	272.79	43.6822	226.759	3.2475	230.872	5.19964	16.874	1.78147	226.759	3.2475
032-ZR23	0.0269233	7.40303	0.00151834	0.37503	57983.9	12.1009	0.0508813	0.552318	0.251317	0.814966	0.0358203	0.470978	0.577912	235.457	25.3881	226.873	2.09971	227.645	3.32123	3.64572	0.339234	226.873	2.09971
022-ZR17	0.159984	9.97796	0.000304898	0.452034	9757.93	25.8691	0.0508396	1.57716	0.251494	1.95882	0.035875	1.10102	0.562081	233.562	72.002	227.213	4.91523	227.789	7.97811	2.71828	0.252693	227.213	4.91523
046-ZR34N	0.0927576	8.24386	0.000559739	1.08604	16830	17.3817	0.0503543	0.782799	0.249305	0.992231	0.0359055	0.484205	0.487996	211.38	36.0811	227.403	2.16362	226.011	4.01704	-7.58023	-0.615732	227.403	2.16362
115-ZR86	0.0696634	9.00326	0.000599141	0.467293	22409.3	14.6337	0.0504486	0.95953	0.250487	1.15813	0.0360083	0.53223	0.459561	215.716	44.1373	228.043	2.38477	226.972	4.70565	-5.71445	-0.471842	228.043	2.38477
061-ZR44	0.209323	6.97517	0.000195505	0.486046	7457.86	12.4832	0.0528839	1.34648	0.263242	1.50901	0.0360991	0.571671	0.37884	323.819	60.5845	228.608	2.56772	237.276	6.37584	29.4025	3.65297	228.608	2.56772
100-ZR75	0.412024	12.4983	0.000117287	0.476658	3788.86	16.7192	0.0529087	1.3598	0.263476	1.57319	0.0361143	0.69898	0.444308	324.885	61.1668	228.703	3.14074	237.464	6.65125	29.6051	3.68962	228.703	3.14074
105-ZR78	0.059	10.0366	0.000712787	0.768692	26459.3	18.6011	0.0511945	0.63919	0.255091	0.882348	0.0361358	0.482371	0.54669	249.598	29.2884	228.836	2.16877	230.703	3.63857	8.31815	0.80926	228.836	2.16877
111-ZR84	0.0627899	7.96179	0.000718752	0.380641	24862.2	13.7182	0.0504625	0.781538	0.251791	0.975341	0.0361858	0.450772	0.462169	216.352	35.9908	229.147	2.02942	228.03	3.98015	-5.91399	-0.489886	229.147	2.02942
048-ZR35	0.0760974	11.1077	0.000835319	0.651791	20514.4	18.3376	0.0521177	0.656261	0.260377	0.953356	0.0362313	0.583882	0.612448	290.577	29.8465	229.43	2.63182	234.971	3.99568	21.0432	2.35796	229.43	2.63182
008-ZR6	0.174698	13.4077	0.000332274	0.595237	8935.92	18.4813	0.0515029	0.905995	0.258416	1.09912	0.0363876	0.49994	0.454856	263.402	41.3332	230.403	2.26287	233.39	4.57835	12.5279	1.27973	230.403	2.26287
011-ZR9	0.0993994	17.0219	0.000575775	0.65747	15705.2	17.3367	0.0511592	0.934084	0.257005	1.16346	0.0364321	0.586368	0.503988	248.011	42.7244	230.679	2.65716	232.251	4.82502	6.98835	0.676591	230.679	2.65716
029-ZR20	0.0600432	10.8666	0.000731868	0.30523	25999.3	17.6273	0.0517103	0.821345	0.260056	1.03233	0.0364717	0.503791	0.488014	272.621	37.4315	230.926	2.28538	234.712	4.32209	15.2942	1.61321	230.926	2.28538
080-ZR58	0.0249629	13.0659	0.00177704	0.357527	62535.9	14.3731	0.0509208	0.508619	0.256363	0.757036	0.0365112	0.420853	0.555922	237.244	23.379	231.172	1.91117	231.732	3.13459	2.5597	0.241719	231.172	1.91117
020-ZR15	0.0183623	7.36229	0.00194347	0.574549	85015.2	12.7891	0.0508523	0.427194	0.256465	0.748151	0.0365749	0.489838	0.654732	234.143	19.6586	231.568	2.22816	231.814	3.09881	1.09967	0.106383	231.568	2.22816
035-ZR26	0.343971	8.9015	0.000116989	0.392277	4538.4	13.779	0.0524856	1.60719	0.264776	1.87547	0.0365851	0.892768	0.476023	306.625	72.4053	231.631	4.06179	238.508	7.95764	24.4578	2.88349	231.631	4.06179
072-ZR53	0.0135869	6.8801	0.002629	0.424772	114894	11.7255	0.0508995	0.451796	0.258475	0.734043	0.0368274	0.444305	0.605285	236.282	20.779	233.138	2.03451	233.437	3.05934	1.33069	0.128355	233.138	2.03451
067-ZR48	0.385919	14.8021	0.000145577	0.554254	4045.03	19.6095	0.0514151	1.38407	0.262189	1.57611	0.0369819	0.656621	0.41661	259.485	62.9778	234.098	3.01877	236.429	6.63781	9.78369	0.985951	234.098	3.01877
071-ZR52	0.164425	4.54804	0.000192665	0.558602	9493.99	9.83134	0.0520138	1.40415	0.265271	1.55282	0.036986	0.549828	0.354083	286.017	63.5801	234.123	2.52811	238.906	6.60057	18.1434	2.00169	234.123	2.52811
112-ZR85	0.107387	18.9265	0.000662674	0.601671	14536.6	22.4546	0.0513888	0.817825	0.262767	1.0683	0.0370825	0.578914	0.5419	258.308	37.368	234.724	2.66854	236.895	4.50942	9.13032	0.916446	234.724	2.66854
095-ZR70	0.0463717	13.2831	0.00106261	0.701221	33663.7	16.0695	0.0509261	0.806468	0.260911	1.1055	0.0371551	0.659118	0.59622	237.485	36.9906	235.175	3.04393	235.401	4.64012	0.972896	0.0960489	235.175	3.04393
084-ZR62	0.0629155	11.8815	0.000684988	0.498336	24811.6	13.6162	0.0511654	0.589564	0.262809	0.846677	0.0372503	0.481647	0.568867	248.29	27.0303	235.767	2.2299	236.928	3.57518	5.04399	0.49031	235.767	2.2299
068-ZR49	0.113165	10.4937	0.000425043	0.352363	13794.2	14.6024	0.0513666	0.769043	0.26506	1.00386	0.0374222	0.528228	0.526194	257.317	35.1573	236.835	2.45641	238.736	4.26689	7.95985	0.796587	236.835	2.45641
010-ZR8	0.156757	11.753	0.000284286	0.832289	9958.25	16.6421	0.0522615	1.44304	0.270488	1.58723	0.0375347	0.54741	0.344883	296.867	65.197	237.534	2.55299	243.084	6.85088	19.9863	2.28326	237.534	2.55299
021-ZR16	0.0633969	12.739	0.000813093	0.795266	24623	16.5656	0.0521197	0.637218	0.269762	0.889489	0.0375358	0.497847	0.5597	290.665	28.9839	237.541	2.32192	242.504	3.83398	18.2768	2.04664	237.541	2.32192
092-ZR68	0.00324641	12.8388	0.00377665	0.481673	480845	75.1275	0.0508861	0.461288	0.263827	0.770097	0.0375999	0.492919	0.640075	235.673	21.2165	237.939	2.30272	237.746	3.26203	-0.96132	-0.0809019	237.939	2.30272
031-ZR22	0.0633824	14.3971	0.000802926	0.573172	24628.5	16.6266	0.052148	0.842592	0.270993	1.04178	0.0376865	0.487897	0.468331	291.903	38.2619	238.477	2.28432	243.487	4.50575	18.3027	2.05758	238.477	2.28432
130-ZR99	0.130909	14.7102	0.000406807	0.38833	11924.4	19.8478	0.0521863	1.04491	0.271821	1.22287	0.037774	0.516025	0.421979	293.58	47.368	239.02	2.42141	244.149	5.30067	18.5842	2.10045	239.02	2.42141
017-ZR12B	0.0463483	11.97	0.000992092	0.453387	33679.8	18.1312	0.0511952	0.770848	0.267842	1.10104	0.0379417	0.693396	0.629763	249.629	35.2882	240.062	3.26752	240.967	4.71818	3.83245	0.375787	240.062	3.26752
055-ZR38	0.0498085	9.0619	0.000797124	0.65322	31340	12.3197	0.0513135	0.769198	0.268706	0.991404	0.0379762	0.503907	0.508277	254.939	35.1794	240.276	2.37675	241.659	4.25962	5.75155	0.572004	240.276	2.37675
012-ZR10	0.134676	9.87998	0.000313806	0.988921	11590.7	17.3787	0.0504294	1.49322	0.266074	1.68169	0.0382635	0.679021	0.403773	214.834	68.4409	242.06	3.22592	239.55	7.16444	-12.6729	-1.04793	242.06	3.22592
037-ZR28	0.0288146	9.96913	0.00109027	0.405381	54173.3	15.9685	0.0513237	0.613921	0.27086	0.923113	0.038273	0.581331	0.629751	255.393	28.1061	242.119	2.76252	243.381	3.99148	5.19748	0.518263	242.119	2.76252
127-ZR96	0.162288	8.90833	0.000282646	1.10162	9618.52	14.6911	0.0528866	0.997422	0.280122	1.19482	0.0384121	0.543565	0.454933	323.936	44.9867	242.983	2.59211	250.754	5.30265	24.9906	3.09936	242.983	2.59211
096-ZR71	0.120891	10.7197	0.000430721	0.540171	12912.1	16.9927	0.0516782	1.04147	0.274676	1.20867	0.0385461	0.488819	0.404426	271.196	47.4024	243.815	2.3389	246.426	5.28233	10.0965	1.05957	243.815	2.3389
110-ZR83	0.085105	16.4291	0.000606309	0.366107	18341.5	18.3963	0.0512321	0.725551	0.273655	0.971179	0.0387371	0.528651	0.544339	251.286	33.2153	245	2.54153	245.612	4.2331	2.50131	0.248918	245	2.54153
119-ZR90	0.091557	11.9609	0.000620852	1.67032	17049	19.4091	0.0513238	1.35565	0.274263	1.51436	0.0387538	0.564109	0.372505	255.399	61.742	245.104	2.71311	246.096	6.60833	4.03079	0.403227	245.104	2.71311
085-ZR63	0.124636	9.98746	0.000331965	0.425173	12524	13.374	0.0498653	1.50422	0.26836	1.69738	0.0390287	0.693637	0.408652	188.721	69.2668	246.81	3.35877	241.381	7.28005	-30.7799	-2.2489	246.81	3.35877
075-ZR56N	0.0360851	12.5623	0.00121284	0.474669	43256.9	16.1603	0.0506833	0.529052	0.274	0.826141	0.039206	0.515093	0.623492	226.451	24.3623	247.909	2.5052	245.887	3.60504	-9.47615	-0.822556	247.909	2.5052
060-ZR43	0.101097	11.3807	0.000625196	0.494814	15439.8	19.078	0.0517074	0.861677	0.281294	1.05885	0.0394525	0.491309	0.464002	272.491	39.2594	249.438	2.40399	251.684	4.71522	8.46011	0.892143	249.438	2.40399
123-ZR94	0.163001	12.4108	0.00029943	0.553439	9576.03	17.3096	0.054004	1.10481	0.29602	1.26511	0.0397523	0.492543	0.389328	371.216	49.3798	251.297	2.42763	263.287	5.85965	32.3044	4.55395	251.297	2.42763
076-ZR56B	0.0318379	10.9259	0.00159138	0.4769	49025.9	19.8781	0.0512306	0.587181	0.282858	0.877378	0.0400409	0.536393	0.611359	251.22	26.9072	253.087	2.6622	252.922	3.92479	-0.742921	-0.065194	253.087	2.6622
009-ZR7	0.332027	21.5161	0.000259612	0.980362	4700.99	26.1504	0.0523113	1.29058	0.292293	1.48684	0.0405219	0.638594	0.429498	299.041	58.3479	256.067	3.20595	260.363	6.81792	14.3707	1.64998	256.067	3.20595
044-ZR32	0.0308366	11.1579	0.001588	0.360316	50617	18.2905	0.0511447	0.709987	0.285806	0.956312	0.0405263	0.522645	0.546521	247.358	32.5293	256.094	2.62419	255.253	4.31216	-3.53175	-0.329612	256.094	2.62419
118-ZR89	0.0235153	15.8481	0.000622924	0.505138	66376.1	81.0154	0.0521145	0.806366	0.291688	0.997762	0.0405906	0.456082	0.457105	290.438	36.6357	256.493	2.2935	259.887	4.57045	11.6876	1.30603	256.493	2.2935
120-ZR91	0.267947	12.7723	0.000209134	0.344965	5825.2	19.417	0.0538943	1.70713	0.302488	1.82917	0.0407035	0.542476	0.29657	366.635	76.0456	257.192	2.73519	268.342	8.6085	29.8505	4.15501	257.192	2.73519
023-ZR18	0.0558269	9.17746	0.000771008	0.475739	27958.7	14.6432	0.0527823	0.860891	0.296542	1.09266	0.040744	0.561672	0.514042	319.452	38.8965	257.443	2.83467	263.696	5.06875	19.4112	2.37121	257.443	2.83467
006-ZR4	0.0638493	20.0277	0.00108525	0.376011	24445.6	22.3992	0.0525395	0.534258	0.296485	0.787539	0.0409245	0.444403	0.564293	308.962	24.2389	258.561	2.25243	263.651	3.65407	16.3132	1.93077	258.561	2.25243
069-ZR50	0.139626	8.0054	0.000263799	1.09425	11178.7	12.9089	0.0521659	1.38792	0.295114	1.60844	0.041027	0.723511	0.449822	292.69	62.7772	259.195	3.67569	262.577	7.42937	11.4435	1.28781	259.195	3.67569
005-ZR3	0.0583567	13.1883	0.000805212	0.338507	26746.3	16.3617	0.0521945	0.874733	0.29592	1.03887	0.0411165	0.420468	0.404737	293.939	39.6981	259.75	2.14073	263.209	4.81173	11.6313	1.31405	259.75	2.14073
103-ZR76	0.0908576	11.5925	0.000553963	0.79822	17178.7	16.9554	0.0517227	1.04034	0.294163	1.21724	0.0412452	0.511943	0.420576	273.168	47.3346	260.547	2.61425	261.831	5.61095	4.62037	0.490482	260.547	2.61425
091-ZR67	0.0361459	9.84129	0.00125639	0.565711	43180.6	14.2418	0.0523395	0.677672	0.299459	0.986432	0.0414929	0.61361	0.622049	300.271	30.7624	262.08	3.15141	265.978	4.61115	12.7187	1.46534	262.08	3.15141
073-ZR54	0.0543087	13.4748	0.000945125	0.435757	28736.4	16.5447	0.0522999	0.666791	0.32031	0.954247	0.0444156	0.573309	0.600798	298.546	30.2801	280.145	3.14302	282.141	4.69584	6.16333	0.707442	280.145	3.14302
058-ZR41	0.0753641	8.89751	0.000465519	0.333644	20707.4	11.0628	0.0527936	1.1171	0.329037	1.28714	0.0451992	0.52109	0.404842	319.935	50.3783	284.979	2.90498	288.831	6.46106	10.9259	1.33337	284.979	2.90498
024-ZR19	0.0407318	11.188	0.0011012	0.270795	38313.9	15.4249	0.0526596	0.531278	0.328313	0.795636	0.0452144	0.462046	0.580726	314.157	24.082	285.074	2.57669	288.277	3.98965	9.25761	1.11127	285.074	2.57669
003-ZR1	0.0769167	16.4048	0.000778161	0.295747	20289	19.2655	0.0526916	0.647579	0.332723	0.870636	0.0457939	0.448727	0.515401	315.54	29.3227	288.646	2.53308	291.642	4.40928	8.52316	1.02731	288.646	2.53308
038-ZR29N	0.0293585	16.5674	0.000717651	0.296138	53154.5	45.7409	0.0540498	0.927904	0.344488	1.11871	0.0462217	0.503207	0.449809	373.126	41.5096	291.283	2.86595	300.567	5.81264	21.9344	3.08873	291.283	2.86595
063-ZR46	0.0157003	10.2285	0.00252509	0.39085	99395.1	14.0404	0.0542297	0.50449	0.346371	0.818304	0.0463202	0.527085	0.644119	380.602	22.6049	291.89	3.00804	301.988	4.27066	23.3082	3.34385	291.89	3.00804
074-ZR55	0.0445632	10.782	0.00113532	0.296676	35018	16.4994	0.0519616	0.709254	0.334364	0.939157	0.0466663	0.491612	0.523461	283.721	32.2843	294.022	2.82565	292.892	4.77346	-3.63071	-0.385708	294.022	2.82565
057-ZR40	0.0316707	10.8018	0.0014888	0.301989	49272.6	15.6942	0.053491	0.632908	0.345931	0.869757	0.0469001	0.46756	0.537575	349.683	28.4883	295.462	2.70028	301.656	4.5346	15.5058	2.05327	295.462	2.70028
041-ZR29B	0.0797364	10.4981	0.000586634	0.414349	19570.6	16.0955	0.053352	0.770797	0.345733	1.02766	0.0469955	0.569799	0.554461	343.796	34.6978	296.049	3.29705	301.507	5.35451	13.8881	1.81006	296.049	3.29705
093-ZR69N	0.0853601	11.6319	0.000590891	0.403682	18279.3	17.1442	0.0538332	0.839358	0.370449	1.08007	0.049905	0.569865	0.527616	364.077	37.6313	313.938	3.49185	319.986	5.92033	13.7716	1.88996	313.938	3.49185
094-ZR69B	0.0905185	11.7274	0.000519197	0.308196	17237.3	16.8531	0.0530111	0.765548	0.368702	1.02796	0.0504399	0.577367	0.561661	329.274	34.5515	317.222	3.5739	318.691	5.61569	3.66024	0.460983	317.222	3.5739
062-ZR45	0.0449265	16.6414	0.00138196	0.130574	34727.5	19.7816	0.0529174	0.506605	0.381806	0.807652	0.0523251	0.508292	0.629346	325.258	22.9222	328.781	3.25812	328.366	4.52685	-1.08311	-0.126274	328.781	3.25812
Data discarded due to high analytical error
004-ZR2	0.507581	19.4554	0.000127434	0.762021	3076.54	29.3662	0.0794136	5.33037	0.293921	5.43587	0.0268412	0.999301	0.183835	1182.46	203.769	170.748	3.36734	261.641	24.9221	85.5599	34.7396
007-ZR5	0.382733	14.7303	0.000185386	1.31336	4080.03	24.0665	0.0471314	3.68092	0.177975	3.75574	0.0273851	0.647432	0.172385	55.8892	171.059	174.162	2.22477	166.316	11.4908	-211.62	-4.71714
015-ZR11	0.0896561	18.2472	0.000526208	0.739919	17411.2	45.8738	0.0444221	6.88128	0.229922	6.92442	0.037536	0.676912	0.0977572	-87.2391	321.245	237.542	3.15698	210.134	26.1186	372.288	-13.0427
018-ZR13	0.193605	13.1542	0.00020223	0.428688	8063.65	24.1167	0.0480953	3.79215	0.231853	3.86355	0.0349605	0.639772	0.165592	103.959	174.541	221.52	2.78599	211.728	14.7139	-113.084	-4.62482
030-ZR21	0.707686	21.7826	9.3268e-05	0.843447	2205.75	22.056	0.0249919	27.3112	0.132096	27.3378	0.0383316	1.1474	0.0419714	-1760.03	1556.51	242.483	5.46002	125.98	63.7667	113.777	-92.4782
033-ZR24	0.0702548	26.6424	0.000240028	0.458876	22228.5	78.3717	0.054096	6.3467	0.190137	6.39306	0.0254899	0.673306	0.105318	375.047	273.668	162.259	2.15755	176.746	20.6362	56.7363	8.19655
036-ZR27	0.911222	12.1753	5.53328e-05	0.350797	1713.94	19.0707	0.0480697	4.2087	0.153186	4.3038	0.0231107	0.819905	0.190507	102.7	193.202	147.286	2.3876	144.721	11.5769	-43.4128	-1.77228
042-ZR30	0.209493	26.6236	0.000242002	0.64551	7448	27.3058	0.0387472	15.2629	0.2683	15.293	0.0502166	0.884568	0.0578414	-433.825	719.442	315.851	5.452	241.334	64.6576	172.806	-30.8773
059-ZR42	0.0364864	22.0727	0.00158599	0.352937	42771.6	23.6766	0.05022	1.66432	0.314489	1.8059	0.0454146	0.594975	0.329463	205.189	76.325	286.308	3.33194	277.655	8.75518	-39.5335	-3.11654
064-ZR47	0.703776	9.47628	5.73715e-05	0.476021	2219.13	13.9711	0.0494109	2.86879	0.159357	3.03223	0.0233891	0.909488	0.29994	167.374	131.361	149.04	2.67962	150.14	8.4464	10.9539	0.732765
070-ZR51	0.480331	35.9777	0.000223733	0.837958	3250.55	32.8835	0.0498072	8.10855	0.217046	8.15213	0.0316028	0.755792	0.092711	186.005	357.204	200.572	2.98479	199.448	29.3115	-7.83176	-0.563451
097-ZR72	0.0415703	30.3425	0.0022402	0.453264	37549.7	42.1495	0.060941	1.75296	0.32619	1.87398	0.0388175	0.54922	0.293077	637.152	74.5522	245.499	2.64569	286.653	9.33879	61.4693	14.3567
108-ZR81	0.145057	94.4497	0.00117575	1.20767	10766.3	37.0743	0.0464724	6.04977	0.156024	6.07863	0.0243479	0.461217	0.0758751	22.1988	278.318	155.076	1.41333	147.216	16.5926	-598.581	-5.33891
109-ZR82	0.149968	15.625	0.000184367	0.5318	10408.6	41.6776	0.0557056	1.54209	0.296809	1.68632	0.0386407	0.572999	0.339793	440.652	67.8923	244.402	2.74812	263.905	7.82282	44.5363	7.3902
128-ZR97	0.597902	29.5677	0.000179916	1.27139	2610.79	29.9203	0.0673547	1.63233	0.352632	1.83222	0.0379682	0.745138	0.406686	848.761	67.1493	240.226	3.51367	306.699	9.67707	71.6968	21.6735
Data discarded due to the high 204Pb
016-ZR12N	24.0069	93.2057	8.11712e-05	0.313605	64.9693	10.582	0.313875	3.51043	2.60732	4.1235	0.0602427	2.1314	0.516891	3540.08	106.15	377.101	15.6045	1302.7	59.6407	89.3477	71.0524
122-ZR93	1.24788	10.5104	3.57185e-05	0.324347	1251.55	15.2353	0.0624425	4.006	0.198672	4.22536	0.023074	1.29164	0.305687	689.298	166.445	147.054	3.75527	184.002	14.1724	78.6661	20.08

## Sheet: Sample TAV
Sample PGZ01 (32.877764°S - 69.901819°W)
LA.TE. ANDES laboratory (Salta, Argentina)
Identifier	232Th(ppm)	238U (ppm)	Th/U (mass)	207Pb/ 235U	2ѳ	206Pb/ 238U	2ѳ	207Pb/ 206Pb	2ѳ	Rho XY	Rho YZ	207Pb/ 235U	2ѳ	207Pb/ 206Pb	2ѳ	206Pb/ 238U	2ѳ	Best Age	2ѳ
C523 - 29	120.701	794.323	0.151955	0.601018	0.0364453	0.0697519	0.00270937	0.062283	0.00364564	0.0743408	0.743181	477.879	28.9783	682.886	39.9717	434.659	16.8835	434.659	16.8835
C523 - 50	202.735	400.016	0.506818	1.3654	0.0560747	0.131948	0.0046661	0.0751054	0.00204285	0.0832121	2.28411	874.19	35.9016	1070.43	29.1154	798.967	28.254	798.967	28.254
C523 - 27	75.5983	751.375	0.100613	1.13131	0.0936873	0.116865	0.00691921	0.0698534	0.00360846	0.0738543	1.91749	768.379	63.6317	923.129	47.6867	712.491	42.1844	712.491	42.1844
C523 - 17	364.978	265.187	1.3763	0.659872	0.0490925	0.0778299	0.00329838	0.0612724	0.00399473	0.0671871	0.825684	514.536	38.2799	647.852	42.2375	483.155	20.4758	483.155	20.4758
C523 - 45	120.537	258.214	0.466811	0.376377	0.0244588	0.0484522	0.00174401	0.0532546	0.0032861	0.0713042	0.530724	324.369	21.079	338.65	20.8965	305.011	10.9787	305.011	10.9787
C523 - 49	28.3871	1168.29	0.024298	1.09172	0.0420588	0.116216	0.00377043	0.0666523	0.00149114	0.0896467	2.52855	749.342	28.8684	825.997	18.4791	708.744	22.994	708.744	22.994
C523 - 40	156.988	172.885	0.908053	0.356197	0.0216538	0.046807	0.00173282	0.0552307	0.00295048	0.0800237	0.587299	309.372	18.8072	420.578	22.4677	294.888	10.9169	294.888	10.9169
C523 - 38	141.887	623.738	0.227478	0.427493	0.0186127	0.0550837	0.00175836	0.0542641	0.00187371	0.094471	0.938442	361.395	15.7349	381.022	13.1565	345.656	11.0339	345.656	11.0339
C523 - 44	74.9383	111.367	0.672894	1.01337	0.0543277	0.111246	0.00384331	0.0639002	0.00308739	0.070743	1.24484	710.573	38.0947	737.384	35.6274	679.978	23.4918	679.978	23.4918
C523 - 6	40.2421	252.638	0.159288	0.583338	0.0420967	0.0720425	0.0029551	0.0589038	0.00402903	0.0701978	0.733451	466.604	33.6726	562.571	38.4799	448.448	18.3948	448.448	18.3948
C523 - 3	295.279	295.87	0.998002	0.103628	0.0122489	0.0150543	0.000864661	0.0500286	0.00605019	0.0705908	0.142915	100.119	11.8342	195.283	23.6165	96.3225	5.53241	96.3225	5.53241
C523 - 28	42.7349	340.336	0.125567	0.747358	0.112327	0.0888258	0.00326262	0.0611146	0.0104958	0.0290458	0.310851	566.69	85.1728	642.309	110.31	548.587	20.1499	548.587	20.1499
C523 - 9	97.2988	319.136	0.304882	0.746651	0.0522407	0.0890087	0.00390272	0.0609529	0.00362588	0.0747066	1.07635	566.279	39.6207	636.614	37.8699	549.67	24.1011	549.67	24.1011
C523 - 42	332.776	587.746	0.56619	0.742877	0.0333069	0.0887942	0.00285843	0.0584935	0.00198203	0.0858208	1.44217	564.083	25.2907	547.32	18.5457	548.4	17.6539	548.4	17.6539
C523 - 43	3.41593	413.081	0.00826938	0.687224	0.033835	0.0834163	0.00284022	0.0572063	0.00232103	0.0839432	1.22369	531.132	26.1499	498.513	20.2261	516.48	17.5855	516.48	17.5855
C523 - 39	111.654	222.762	0.501225	0.323459	0.0195332	0.0439401	0.00151529	0.0534389	0.00276107	0.0775751	0.548806	284.56	17.1841	346.466	17.9011	277.209	9.55963	277.209	9.55963
C523 - 32	29.7436	635.594	0.0467966	1.78699	0.0797149	0.171486	0.00506238	0.0756925	0.00269794	0.0635061	1.87639	1040.73	46.4253	1086.06	38.7107	1020.29	30.1196	1020.29	30.1196
C523 - 23	33.6483	97.06	0.346675	2.35296	0.125152	0.207315	0.00684353	0.0825105	0.00389078	0.054682	1.75891	1228.45	65.3403	1256.79	59.2638	1214.49	40.0908	1214.49	40.0908
C523 - 36	271.445	412.486	0.658071	0.313242	0.0153739	0.0433715	0.00145355	0.0524165	0.00251725	0.0945465	0.577435	276.691	13.58	302.603	14.5322	273.696	9.17264	273.696	9.17264
C523 - 2	101.447	355.112	0.285675	0.580367	0.0484713	0.0741683	0.00548138	0.0569364	0.00475451	0.113085	1.15288	464.697	38.8108	488.086	40.7579	461.218	34.0861	461.218	34.0861
C523 - 15	123.347	159.524	0.773216	7.3253	0.339736	0.392871	0.0141257	0.135573	0.00455736	0.0415784	3.09953	2151.9	99.8017	2170.62	72.9665	2136.12	76.8043	2136.12	76.8043
C523 - 25	239.979	502.479	0.47759	0.438632	0.0241743	0.0587296	0.00181116	0.054292	0.00239936	0.0749209	0.754852	369.287	20.3525	382.176	16.8898	367.894	11.3455	367.894	11.3455
C523 - 10	339.822	393.829	0.862867	2.01596	0.10618	0.189333	0.0077226	0.0772788	0.00374437	0.0727314	2.06246	1120.9	59.0373	1127.5	54.6307	1117.76	45.5916	1117.76	45.5916
C523 - 30	70.0816	151.556	0.462415	0.750681	0.0535334	0.0920553	0.00351133	0.0591937	0.00404825	0.0655914	0.86737	568.62	40.55	573.258	39.205	567.679	21.6534	567.679	21.6534
C523 - 8	228.154	274.546	0.831022	0.321658	0.0263994	0.0449207	0.00189508	0.0520864	0.00411099	0.0717849	0.460978	283.177	23.2412	288.183	22.7453	283.261	11.95	283.261	11.95
C523 - 24	165.4	271.286	0.609691	0.618763	0.0370671	0.0788625	0.00260844	0.0570098	0.00311237	0.0703707	0.838088	489.071	29.298	490.928	26.8015	489.328	16.1849	489.328	16.1849
C523 - 16	123.749	493.129	0.250946	0.625167	0.0319866	0.0797269	0.0025065	0.0569841	0.00252826	0.0783609	0.991393	493.081	25.2284	489.934	21.7373	494.491	15.5461	494.491	15.5461
C523 - 1	128.827	327.193	0.393733	0.296311	0.022185	0.0419115	0.00142839	0.05141	0.0035023	0.0643852	0.407843	263.515	19.7296	258.228	17.5918	264.67	9.02022	264.67	9.02022
C523 - 7	180.342	214.694	0.839995	0.316797	0.0275832	0.0445359	0.00172694	0.0517439	0.00446583	0.0626085	0.386702	279.436	24.3302	273.088	23.5692	280.887	10.8918	280.887	10.8918
C523 - 21	102.978	165.997	0.62036	1.62218	0.0840841	0.165093	0.00546976	0.0714094	0.00323693	0.0650511	1.6898	978.836	50.7369	968.246	43.8897	985.014	32.6349	985.014	32.6349
C523 - 37	182.807	228.691	0.799362	0.273312	0.0179269	0.0390574	0.00139044	0.0507856	0.00294418	0.0775614	0.472266	245.338	16.0921	230.079	13.3383	246.987	8.79268	246.987	8.79268
C523 - 13	77.0121	294.664	0.261355	1.94872	0.103595	0.187098	0.00643911	0.0756938	0.00345298	0.0621568	1.8648	1098.01	58.3703	1086.09	49.5449	1105.63	38.0511	1105.63	38.0511
C523 - 12	95.6873	302.112	0.316728	5.12229	0.293595	0.33459	0.0156811	0.111331	0.00368865	0.0534107	4.25117	1839.81	105.453	1820.45	60.3157	1860.59	87.1994	1860.59	87.1994
C523 - 34	232.389	228.294	1.01794	0.176606	0.0165539	0.0262638	0.00126161	0.0488546	0.00457084	0.0762121	0.276012	165.136	15.4787	139.811	13.0807	167.122	8.02785	167.122	8.02785
C523 - 18	155.406	395.443	0.392991	0.501114	0.028741	0.0669533	0.00220293	0.0543977	0.00279234	0.0766479	0.788919	412.456	23.6561	386.548	19.8423	417.773	13.7458	417.773	13.7458
C523 - 22	127.023	195.013	0.651357	2.91506	0.12814	0.244833	0.00711992	0.0865462	0.00290471	0.0555637	2.45117	1385.83	60.9179	1349.55	45.2943	1411.77	41.0553	1411.77	41.0553
C523 - 20	72.1878	176.43	0.409159	1.92293	0.0991479	0.18851	0.00652272	0.0741832	0.00330585	0.0657878	1.97309	1089.08	56.1543	1045.56	46.5934	1113.29	38.5216	1113.29	38.5216
C523 - 11	124.538	170.023	0.732482	0.231068	0.0278577	0.0340427	0.0016973	0.0493214	0.00594693	0.0609272	0.285407	211.08	25.448	162.093	19.5444	215.8	10.7593	215.8	10.7593
C523 - 5	80.8972	178.131	0.454145	0.331907	0.0287111	0.0472493	0.00184369	0.0511064	0.00415603	0.0642153	0.443619	291.021	25.1743	244.604	19.8915	297.611	11.6129	297.611	11.6129
C523 - 27	222.93	274.714	0.811501	2.37998	0.130418	0.21685	0.00722443	0.0796705	0.00348383	0.0553944	2.07371	1236.6	67.7634	1187.96	51.9471	1265.2	42.1507	1265.2	42.1507
C523 - 41	120.073	136.178	0.881732	0.142359	0.0131845	0.0218485	0.00096506	0.0472982	0.00465253	0.0731967	0.207427	135.143	12.5162	63.2479	6.22143	139.327	6.15417	139.327	6.15417
C523 - 26	89.2344	147.237	0.606062	0.164686	0.0371797	0.0250665	0.00204157	0.0475477	0.0112251	0.0549109	0.181875	154.797	34.947	75.765	17.8867	159.597	12.9985	159.597	12.9985
Data not used in the frequency histogram due to the high degree of discordance
C523 - 4	118.202	170.565	0.693003	0.253596	0.0349914	0.0251279	0.00156349	0.0737604	0.0114739	0.0446822	0.136266	229.493	31.6657	1034.02	160.847	159.983	9.95435
C523 - 48	147.762	911.987	0.162022	1.57586	0.0683685	0.110658	0.00441504	0.108474	0.00316209	0.0645772	1.39624	960.74	41.6815	1773.13	51.6879	676.566	26.9937
C523 - 47	770.724	835.423	0.922555	0.824976	0.0370179	0.0690165	0.00223822	0.0837274	0.00235469	0.0604632	0.950539	610.821	27.4084	1285.36	36.1484	430.226	13.9523
C523 - 35	177.793	145.941	1.21825	1.47459	0.248365	0.109725	0.0058598	0.0975821	0.0124331	0.0235935	0.471305	920.014	154.958	1577.59	201.003	671.148	35.8423
C523 - 14	191.965	185.436	1.03521	0.319184	0.0468202	0.0362068	0.00246025	0.0637275	0.0113579	0.0525468	0.216612	281.275	41.2594	731.653	130.399	229.277	15.5794
C523 - 10	216.382	557.129	0.388388	0.729555	0.0907776	0.0738461	0.00588391	0.0720894	0.00703915	0.0648167	0.835884	556.292	69.2187	987.558	96.4298	459.284	36.5949
C523 - 26	140.209	1521.27	0.0921655	1.34481	0.076677	0.118376	0.00531748	0.0824735	0.00264797	0.0693492	2.00813	865.316	49.3375	1255.91	40.3235	721.206	32.3968
C523 - 33	167.334	420.264	0.398164	7.29105	0.628453	0.32185	0.0213035	0.164924	0.0053181	0.0338984	4.00585	2147.71	185.123	2506.03	80.8089	1798.75	119.061
C523 - 19	78.4007	458.012	0.171176	1.01318	0.0576322	0.09977	0.00368992	0.0737755	0.0038067	0.0640253	0.969322	710.478	40.4139	1034.43	53.3751	613.059	22.6735
C523 - 32	21.0003	677.811	0.0309825	0.649793	0.047617	0.0704783	0.00299318	0.0671312	0.0050011	0.0628595	0.598504	508.352	37.2521	840.919	62.6462	439.035	18.6456
C523 - 31	131.163	312.69	0.419467	3.91034	0.185657	0.242118	0.0083168	0.117386	0.00465343	0.0447966	1.78724	1615.82	76.7168	1916	75.9544	1397.7	48.0111
C523 - 48	49.9883	173.69	0.287802	2.11287	0.0961229	0.169129	0.00625287	0.0851122	0.00323263	0.0650508	1.9343	1153.01	52.4552	1317.23	50.0295	1007.31	37.2412
C523 - 46	718.091	608.238	1.18061	0.169205	0.00930843	0.0221606	0.000738249	0.0554318	0.00252603	0.0793098	0.292257	158.729	8.7321	428.688	19.5353	141.296	4.70708

## Sheet: Sample CRT1
Sample CRT1 (32.827754°S - 70.064236°W)
LA.TE. ANDES laboratory (Salta, Argentina)
Identifier	232Th(ppm)	238U (ppm)	Th/U (mass)	207Pb/ 235U	1ѳ	206Pb/ 238U	1ѳ	207Pb/ 206Pb	1ѳ	Rho XY	Rho YZ	207Pb/ 235U	1ѳ	207Pb/ 206Pb	1ѳ	206Pb/ 238U	1ѳ	Best Age	1ѳ
C675 - 92	54.2958	75.0787	0.723185	0.0375469	0.00465783	0.00535543	0.000273956	0.051293	0.00665181	0.0588163	0.0411851	34.4311	1.76132	37.4261	4.64285	252.992	32.8087	34.4311	1.76132
C675 - 74	88.4395	118.888	0.743887	0.0383983	0.00385051	0.00542629	0.000235882	0.0472835	0.00493255	0.0612599	0.0478215	34.8855	1.51648	38.2591	3.83655	62.5033	6.52027	34.8855	1.51648
C675 - 65	56.0803	62.2882	0.900336	0.0360294	0.00497079	0.00543395	0.000266512	0.0470818	0.0067664	0.0536156	0.0393875	34.9345	1.71339	35.94	4.95846	52.3124	7.51813	34.9345	1.71339
C675 - 4	175.266	192.167	0.912048	0.0390363	0.0034446	0.00547014	0.000163939	0.048869	0.00451935	0.047593	0.0362749	35.1666	1.05393	38.8827	3.43105	140.503	12.9935	35.1666	1.05393
C675 - 89	74.1939	107.67	0.689085	0.0371944	0.00374617	0.00548589	0.000296509	0.0517008	0.00544779	0.0791499	0.0544274	35.2676	1.90619	37.0811	3.73477	271.175	28.5742	35.2676	1.90619
C675 - 19	136.996	135.473	1.01124	0.0391263	0.00352214	0.0054881	0.000182086	0.0506443	0.00475857	0.0516976	0.0382649	35.2817	1.17059	38.9707	3.50813	223.643	21.0136	35.2817	1.17059
C675 - 75	190.359	188.627	1.00918	0.0360439	0.00319853	0.00549129	0.000154508	0.0452266	0.00395365	0.048306	0.0390798	35.3022	0.993295	35.9542	3.19057	7.27596e-08	6.36055e-09	35.3022	0.993295
C675 - 20	99.6788	127.356	0.782677	0.0382616	0.00376763	0.00551631	0.000196794	0.0499778	0.00513661	0.0522328	0.038312	35.4626	1.26512	38.1253	3.75422	192.923	19.8282	35.4626	1.26512
C675 - 72	147.952	155.282	0.952794	0.0335729	0.00306541	0.00553682	0.000196964	0.0421018	0.0039846	0.0642537	0.0494314	35.5941	1.26621	33.5296	3.06146	7.27596e-08	6.88611e-09	35.5941	1.26621
C675 - 59	151.286	155.998	0.969796	0.0397659	0.00335357	0.00554559	0.000204527	0.0510572	0.00449804	0.0609878	0.0454703	35.6503	1.31482	39.5955	3.3392	242.385	21.3536	35.6503	1.31482
C675 - 67	101.032	114.014	0.886133	0.035675	0.00369261	0.0055634	0.000240692	0.0443458	0.00476579	0.0651819	0.0505041	35.7645	1.54729	35.5927	3.68409	7.27596e-08	7.81938e-09	35.7645	1.54729
C675 - 94	109.396	119.587	0.914778	0.0342814	0.00356128	0.00556846	0.000199607	0.0434543	0.00468238	0.0560493	0.0426294	35.7969	1.28318	34.2254	3.55546	7.27596e-08	7.84015e-09	35.7969	1.28318
C675 - 98	307.999	214.506	1.43585	0.0381655	0.0034562	0.00559989	0.000158343	0.0531374	0.00499105	0.0458143	0.0317255	35.9984	1.0179	38.0314	3.44406	333.657	31.3395	35.9984	1.0179
C675 - 88	198.17	200.781	0.986998	0.0353937	0.00283351	0.0056044	0.000153937	0.0436347	0.00362238	0.0543275	0.0424962	36.0273	0.989571	35.3168	2.82735	7.27596e-08	6.04022e-09	36.0273	0.989571
C675 - 79	164.902	187.683	0.878624	0.0358085	0.00289796	0.00561549	0.000158475	0.0451624	0.00379752	0.054685	0.0417311	36.0984	1.01873	35.7235	2.89108	7.27596e-08	6.11806e-09	36.0984	1.01873
C675 - 64	55.8702	86.2586	0.647706	0.036477	0.00435352	0.00561718	0.000231049	0.044195	0.0054736	0.0530719	0.0422115	36.1092	1.48527	36.3786	4.34177	7.27596e-08	9.01135e-09	36.1092	1.48527
C675 - 17	179.476	199.366	0.900233	0.0390836	0.00301704	0.00562954	0.000159222	0.0477866	0.00370006	0.0527745	0.0430324	36.1885	1.02353	38.9289	3.0051	87.6607	6.78746	36.1885	1.02353
C675 - 73	188.854	171.194	1.10316	0.0343001	0.00316411	0.00563105	0.000163614	0.0419611	0.00375476	0.0517093	0.043575	36.1981	1.05176	34.2437	3.15891	7.27596e-08	6.51067e-09	36.1981	1.05176
C675 - 5	56.5433	81.9094	0.690315	0.0360566	0.00403294	0.00565732	0.000261931	0.0495293	0.00577896	0.0649479	0.0453249	36.3666	1.68375	35.9667	4.02288	171.921	20.0593	36.3666	1.68375
C675 - 99	252.614	198.76	1.27095	0.0403352	0.00305673	0.00566641	0.00019027	0.0504454	0.00514624	0.0622461	0.0369725	36.4248	1.22309	40.1513	3.04279	214.535	21.886	36.4248	1.22309
C675 - 70	301.501	215.872	1.39667	0.0388367	0.00305549	0.00569799	0.000176637	0.0461855	0.00370955	0.0578096	0.0476168	36.6273	1.13544	38.6877	3.04377	6.23851	0.501068	36.6273	1.13544
C675 - 58	90.7796	116.754	0.777532	0.0398519	0.00392275	0.005717	0.000206687	0.0478908	0.00490522	0.0526892	0.0421361	36.7491	1.32859	39.6794	3.90578	92.8199	9.5071	36.7491	1.32859
C675 - 8	204.589	217.922	0.938816	0.0388908	0.00299908	0.00572038	0.000143902	0.0486437	0.00412692	0.0479819	0.034869	36.7708	0.925003	38.7405	2.98749	129.645	10.999	36.7708	0.925003
C675 - 106	67.3418	91.8169	0.733436	0.0405557	0.0041812	0.00572164	0.000257501	0.0566668	0.00613333	0.0615854	0.0419839	36.7788	1.65522	40.3664	4.16169	477.602	51.6933	36.7788	1.65522
C675 - 110	71.5914	107.44	0.666338	0.036926	0.00375821	0.00572725	0.000210855	0.0488328	0.00517891	0.0561052	0.0407142	36.8148	1.35538	36.8184	3.74725	138.764	14.7164	36.8148	1.35538
C675 - 83	184.613	155.599	1.18647	0.038983	0.00333992	0.0057321	0.000195757	0.0468798	0.00417353	0.0586111	0.0469043	36.8459	1.25832	38.8306	3.32687	42.0389	3.74256	36.8459	1.25832
C675 - 82	168.805	160.806	1.04974	0.0378711	0.00339203	0.00574477	0.000189736	0.04733	0.00451835	0.0559358	0.0419923	36.9271	1.21961	37.7434	3.38059	64.8472	6.19062	36.9271	1.21961
C675 - 61	135.549	144.293	0.939401	0.0361498	0.00372117	0.00575402	0.000185108	0.0428987	0.00462319	0.0497445	0.0400389	36.9864	1.18986	36.058	3.71172	7.27596e-08	7.8413e-09	36.9864	1.18986
C675 - 103	112.356	129.488	0.867694	0.0356295	0.0037511	0.00576154	0.000218267	0.0460701	0.00504365	0.0581875	0.0432756	37.0346	1.403	35.548	3.74252	0.214238	0.0234542	37.0346	1.403
C675 - 108	57.0689	85.2441	0.669477	0.036945	0.00412428	0.00576832	0.0002388	0.0512926	0.00598481	0.0579009	0.0399009	37.078	1.53497	36.837	4.11222	252.973	29.5169	37.078	1.53497
C675 - 80	73.5759	109.78	0.670214	0.0415916	0.00415228	0.00577763	0.000254832	0.0487459	0.00506173	0.0613716	0.0503449	37.1377	1.63802	41.3768	4.13084	134.578	13.9744	37.1377	1.63802
C675 - 100	87.1603	103.969	0.838328	0.0369401	0.00383848	0.00581367	0.000251291	0.0490631	0.00531521	0.0654664	0.0472778	37.3687	1.61523	36.8322	3.82726	149.802	16.2287	37.3687	1.61523
C675 - 21	18.6174	33.6106	0.553914	0.0390806	0.00665427	0.00582955	0.000376179	0.053651	0.0095712	0.0565319	0.0393032	37.4705	2.41795	38.926	6.62795	355.419	63.4058	37.4705	2.41795
C675 - 101	149.843	155.838	0.96153	0.0397689	0.00330594	0.00585515	0.000239279	0.0516414	0.00448211	0.0723786	0.0533853	37.6345	1.53799	39.5984	3.29177	268.542	23.3076	37.6345	1.53799
C675 - 90	208.757	157.057	1.32918	0.0400137	0.00332728	0.00587042	0.00018861	0.0491121	0.00425184	0.056686	0.0443597	37.7324	1.2123	39.8374	3.31262	152.141	13.1714	37.7324	1.2123
C675 - 56	78.134	111.578	0.700263	0.03666	0.00377467	0.00589945	0.000210987	0.0448048	0.00479083	0.0558955	0.0440398	37.9185	1.35611	36.5579	3.76416	7.27596e-08	7.77994e-09	37.9185	1.35611
C675 - 105	119.796	140.097	0.855095	0.0422461	0.00362697	0.00592841	0.000193781	0.0521296	0.00466814	0.0534278	0.0415113	38.104	1.2455	42.0146	3.60709	290.081	25.9764	38.104	1.2455
C675 - 27	1191.06	529.591	2.24902	0.0375244	0.00190394	0.00593448	0.000113969	0.045893	0.00228516	0.0598593	0.0498734	38.1429	0.732515	37.4041	1.89784	7.27596e-08	3.62293e-09	38.1429	0.732515
C675 - 31	60.8093	97.4449	0.624038	0.0420375	0.00433689	0.00594077	0.00023552	0.0516057	0.00555682	0.0543062	0.042384	38.1832	1.51376	41.8114	4.31356	266.952	28.745	38.1832	1.51376
C675 - 22	122.697	147.163	0.833754	0.0386356	0.00336946	0.00594524	0.000194467	0.0458919	0.00415486	0.0577146	0.0468048	38.2119	1.2499	38.491	3.35686	7.27596e-08	6.58735e-09	38.2119	1.2499
C675 - 33	102.762	144.158	0.712846	0.0383749	0.0033961	0.00597513	0.000217371	0.04712	0.00461236	0.0640061	0.047128	38.4034	1.39709	38.2362	3.38382	54.2476	5.31005	38.4034	1.39709
C675 - 50	66.5307	70.067	0.94953	0.0354725	0.00488193	0.00599953	0.000284806	0.0403944	0.00574561	0.0583387	0.0495693	38.5598	1.83049	35.3941	4.87114	7.27596e-08	1.03492e-08	38.5598	1.83049
C675 - 16	48.6761	77.3326	0.629439	0.0382367	0.00459562	0.00600706	0.000252672	0.0435807	0.00542064	0.0549811	0.046613	38.608	1.62395	38.101	4.57931	7.27596e-08	9.04996e-09	38.608	1.62395
C675 - 47	133.73	158.949	0.841339	0.0378951	0.00385566	0.00602304	0.000181992	0.0459044	0.00468353	0.0472014	0.038858	38.7104	1.16967	37.7669	3.84261	7.27596e-08	7.4235e-09	38.7104	1.16967
C675 - 48	120.88	154.229	0.783769	0.0394698	0.00331531	0.00606814	0.000217708	0.0489116	0.00428153	0.0656675	0.0508482	38.9994	1.39919	39.3063	3.30158	142.548	12.4781	38.9994	1.39919
C675 - 34	156.773	175.025	0.895717	0.0417708	0.00331762	0.00616419	0.000202463	0.0493325	0.00438817	0.0610265	0.0461383	39.6148	1.30115	41.5515	3.3002	162.618	14.465	39.6148	1.30115
C675 - 42	93.186	124.187	0.75037	0.0411288	0.00389643	0.00617934	0.000223629	0.0476052	0.00468794	0.0573934	0.0477031	39.7119	1.43717	40.9255	3.87717	78.6356	7.74366	39.7119	1.43717
C675 - 38	109.874	147.418	0.745323	0.0404005	0.00351356	0.00653828	0.000212799	0.045783	0.00413096	0.0605651	0.0515132	42.0111	1.36732	40.215	3.49743	7.27596e-08	6.56503e-09	42.0111	1.36732
C675 - 43	219.895	202.435	1.08625	0.200778	0.00780236	0.0295028	0.000364227	0.0504149	0.00193211	0.0466816	0.188513	187.435	2.31398	185.784	7.2197	213.133	8.16812	187.435	2.31398
C675 - 96	334.149	181.606	1.83997	0.233998	0.00818114	0.0342183	0.000500981	0.0515332	0.00198849	0.0612361	0.251941	216.895	3.1755	213.494	7.46427	263.725	10.1763	216.895	3.1755
C675 - 2	257.33	257.765	0.998314	0.259316	0.00700093	0.034466	0.000329606	0.0537061	0.00137012	0.0470802	0.240566	218.439	2.08897	234.116	6.32058	357.737	9.12642	218.439	2.08897
C675 - 97	463.677	205.8	2.25305	0.245247	0.00797647	0.0346073	0.000537942	0.0532208	0.00189907	0.0674411	0.283265	219.319	3.40913	222.708	7.2434	337.21	12.0326	219.319	3.40913
C675 - 49	110.686	59.9198	1.84724	0.256672	0.0151737	0.0374122	0.000767858	0.0509035	0.00281757	0.0506047	0.272525	236.772	4.85957	231.982	13.714	235.431	13.0314	236.772	4.85957
C675 - 28	101.752	358.824	0.283572	0.33808	0.0109104	0.0461588	0.000597778	0.053132	0.00165328	0.0547899	0.36157	290.895	3.76722	295.716	9.54323	333.426	10.3751	290.895	3.76722
C675 - 29	62.8781	157.104	0.400232	0.358885	0.0117849	0.0490167	0.000854758	0.0520652	0.0015901	0.0725297	0.53755	308.481	5.37932	311.382	10.225	287.255	8.77293	308.481	5.37932
C675 - 87	181.702	236.205	0.769258	0.403631	0.0137842	0.0507595	0.000646201	0.0561496	0.00167557	0.0468799	0.385661	319.182	4.06339	344.278	11.7573	457.298	13.6463	319.182	4.06339
C675 - 39	182.619	218.315	0.83649	0.381357	0.0102944	0.0526873	0.000527105	0.0538846	0.00135614	0.0512029	0.388681	330.998	3.31144	328.036	8.85509	365.225	9.19179	330.998	3.31144
C675 - 36	45.4173	83.918	0.541211	0.431829	0.018035	0.0550763	0.000762405	0.0568934	0.00208009	0.0422736	0.366525	345.611	4.78419	364.474	15.222	486.418	17.784	345.611	4.78419
Data not used in the frequency histogram due to the high degree of discordance
C675 - 26	116.302	127.34	0.913323	0.0647236	0.00758456	0.0056395	0.000210092	0.080125	0.0110774	0.0277	0.0189658	36.2523	1.35053	63.68	7.46226	1199.19	165.79
C675 - 40	50.1655	54.0896	0.927453	0.0660501	0.00745326	0.00613303	0.000317174	0.0806561	0.00970283	0.0425551	0.0326888	39.4152	2.03839	64.9443	7.32847	1212.2	145.826
C675 - 12	111.53	141.001	0.790991	0.0591894	0.00586616	0.00601102	0.000184313	0.0707632	0.00718217	0.0314197	0.0256626	38.6334	1.1846	58.3885	5.78678	949.668	96.3873
C675 - 1	45.0139	78.7816	0.571376	0.0518462	0.00525206	0.00544297	0.000302431	0.0670663	0.00716612	0.0575832	0.0422028	34.9924	1.9443	51.3244	5.19921	838.905	89.638
C675 - 60	57.4736	73.5842	0.781059	0.0495015	0.00690083	0.00538002	0.000259576	0.0663504	0.00898036	0.0376152	0.0289048	34.5888	1.66884	49.0586	6.83907	816.518	110.514
C675 - 41	36.2921	61.8149	0.587109	0.058455	0.00668329	0.00649002	0.000305073	0.0644268	0.00773856	0.0456472	0.0394225	41.7021	1.96027	57.6843	6.59517	754.73	90.6537
C675 - 10	30.887	60.2881	0.512324	0.0510294	0.00633858	0.00571701	0.000271406	0.055371	0.00716404	0.0428181	0.0378845	36.7491	1.74461	50.5357	6.27725	426.239	55.1478
C675 - 35	184.466	159.27	1.15819	0.0548743	0.00494262	0.00613875	0.000246909	0.0654981	0.00535579	0.0499552	0.0461014	39.4518	1.58681	54.2434	4.88579	789.441	64.5527
C675 - 62	65.0152	88.8784	0.731507	0.0554813	0.00611884	0.00624836	0.00026019	0.0636831	0.00811877	0.0425228	0.032048	40.1541	1.67207	54.8275	6.04674	730.176	93.088
C675 - 30	100.2	106.246	0.943097	0.0550777	0.00476476	0.00622787	0.000223968	0.0655935	0.00597842	0.0470051	0.0374627	40.0228	1.43931	54.4391	4.70952	792.493	72.2307
C675 - 46	63.5564	90.6513	0.701109	0.0529521	0.00576582	0.00599957	0.000303214	0.0646116	0.00870942	0.0525882	0.0348145	38.56	1.9488	52.3914	5.70477	760.774	102.55
C675 - 54	39.2353	68.6176	0.571796	0.0504901	0.00598913	0.00579017	0.000293525	0.0574353	0.00712974	0.0490097	0.0411691	37.2181	1.88672	50.0145	5.93272	507.307	62.9746
C675 - 9	111.765	163.043	0.685494	0.0447097	0.00339453	0.00526257	0.000172355	0.0584784	0.00465909	0.0507745	0.0369933	33.8356	1.10816	44.4118	3.37191	546.756	43.5612
C675 - 76	79.3257	108.796	0.729121	0.0458918	0.00449135	0.00543179	0.000230135	0.054787	0.00560502	0.0512397	0.0410588	34.9207	1.47953	45.5602	4.45889	402.542	41.1823
C675 - 63	79.8901	91.2464	0.875542	0.0466574	0.0047279	0.0055343	0.000223545	0.0597999	0.00637236	0.0472821	0.0350804	35.5779	1.43709	46.3032	4.692	595.375	63.444
C675 - 18	126.671	147.683	0.857721	0.0483845	0.00452308	0.00587456	0.000250296	0.059979	0.00537095	0.0553374	0.0466017	37.7589	1.60878	47.9773	4.48501	601.851	53.8941
C675 - 25	61.5909	97.9712	0.628664	0.0485916	0.00549481	0.00592385	0.000225478	0.0602049	0.00734268	0.0410347	0.0307078	38.0748	1.44923	48.1779	5.44802	609.981	74.3942
C675 - 55	112.162	102.544	1.09379	0.0462024	0.00456718	0.00565377	0.00022706	0.0550898	0.00569638	0.0497155	0.0398603	36.3438	1.45959	45.8616	4.53349	414.874	42.8987
C675 - 78	167.142	178.664	0.935513	0.0427187	0.00330166	0.00528796	0.00020424	0.0552106	0.00447077	0.0618598	0.0456834	33.9985	1.31314	42.475	3.28282	419.764	33.9911
C675 - 66	84.5626	89.9349	0.940265	0.0464476	0.00580497	0.00584745	0.000228957	0.0585764	0.00659035	0.0394416	0.0347413	37.5852	1.47165	46.0996	5.76147	550.413	61.9262
C675 - 53	190.261	154.218	1.23371	0.0466515	0.0036629	0.00590997	0.000183743	0.0552083	0.00453385	0.0501633	0.0405269	37.9859	1.18099	46.2974	3.6351	419.67	34.4644
C675 - 102	37.6909	63.2642	0.59577	0.0441531	0.00534471	0.00568319	0.000345567	0.0603829	0.00769221	0.064656	0.0449243	36.5324	2.22136	43.8708	5.31053	616.359	78.5183
C675 - 7	235.742	187.619	1.2565	0.0442163	0.00315077	0.00569211	0.000230962	0.0540946	0.00402417	0.0733035	0.0573938	36.5895	1.48465	43.9322	3.13053	373.983	27.8211
C675 - 81	201.956	177.049	1.14068	0.0397721	0.00494575	0.00513696	0.000211364	0.053662	0.00610289	0.0427365	0.0346335	33.0301	1.35905	39.6015	4.92454	355.882	40.4739
C675 - 14	188.037	165.668	1.13503	0.0404032	0.00469975	0.00527827	0.000159337	0.0553009	0.0063512	0.0339034	0.0250878	33.9363	1.02445	40.2177	4.67816	423.414	48.6283
C675 - 69	67.1831	90.4874	0.742458	0.0433729	0.00465601	0.00566117	0.000267152	0.0507518	0.00567632	0.0573779	0.0470643	36.3912	1.71731	43.1118	4.62798	228.544	25.5614
C675 - 71	219.004	157.036	1.39461	0.0431839	0.00462477	0.00564043	0.000276789	0.053101	0.00594983	0.0598492	0.0465204	36.2583	1.77928	42.9278	4.59735	332.103	37.2112
C675 - 91	83.6766	120.826	0.692539	0.0432503	0.00405562	0.00566879	0.000200403	0.0533641	0.00522693	0.0494137	0.0383405	36.4401	1.28823	42.9925	4.03145	343.298	33.6255
C675 - 95	56.3542	87.4756	0.644228	0.0388501	0.00447952	0.00516651	0.000227459	0.0545079	0.00659026	0.0507776	0.0345145	33.2196	1.46252	38.7007	4.4623	391.091	47.2847
C675 - 86	61.4227	84.639	0.725703	0.0428372	0.00482798	0.00569485	0.000257848	0.0513248	0.00602964	0.0534071	0.0427635	36.6071	1.65748	42.5903	4.80015	254.42	29.8892
C675 - 77	43.634	76.905	0.567376	0.043846	0.00507264	0.00582693	0.0002514	0.0521712	0.00629662	0.0495599	0.0399262	37.4537	1.61592	43.5721	5.04095	291.899	35.2298
C675 - 13	1884.68	952.412	1.97885	0.0442163	0.00296498	0.00589891	0.000119209	0.0522626	0.00324055	0.0402056	0.0367867	37.915	0.766211	43.9322	2.94593	295.898	18.3472
C675 - 3	142.229	170.663	0.833392	0.0403604	0.00310023	0.00541707	0.000156118	0.0526618	0.0045198	0.0503567	0.0345408	34.8263	1.00368	40.1759	3.08606	313.239	26.8843
C675 - 15	296.39	265.176	1.11771	0.0436762	0.00358801	0.00587601	0.00019122	0.0535001	0.00560024	0.0532942	0.034145	37.7682	1.22907	43.4069	3.56588	349.054	36.5381
C675 - 11	184.938	196.139	0.942891	0.0406234	0.00294975	0.00553955	0.000148739	0.0510204	0.00386261	0.0504242	0.0385073	35.6116	0.956182	40.4325	2.93589	240.721	18.2243
C675 - 52	540.39	371.917	1.45299	0.0415772	0.00256954	0.00568501	0.0001138	0.050336	0.00319458	0.0442879	0.0356228	36.544	0.73152	41.3627	2.55629	209.504	13.2962
C675 - 68	2276.82	1016.91	2.23896	0.0369924	0.00210748	0.00510544	0.000100375	0.0471744	0.00271248	0.0476279	0.0370048	32.828	0.645409	36.8834	2.10127	56.9999	3.27743
C675 - 93	211.544	201.583	1.04941	0.0408647	0.00351792	0.00565063	0.000167045	0.0513335	0.00462191	0.047484	0.036142	36.3237	1.07381	40.6679	3.50098	254.808	22.9421
C675 - 51	75.0858	100.707	0.74559	0.0343832	0.00376822	0.00599649	0.000224408	0.0428471	0.00487108	0.0595528	0.0460695	38.5403	1.4423	34.3253	3.76188	7.27596e-08	8.27168e-09
C675 - 104	72.426	106.512	0.679981	0.0329381	0.00360459	0.00591695	0.000217948	0.0419669	0.00475718	0.0604641	0.0458145	38.0306	1.40084	32.9058	3.60105	7.27596e-08	8.2477e-09
C675 - 107	145.292	136.131	1.06729	0.0323142	0.00325466	0.0059015	0.00025783	0.0422902	0.00524469	0.0792188	0.0491602	37.9316	1.65719	32.2923	3.25245	7.27596e-08	9.0234e-09
C675 - 85	38.0729	49.4245	0.770325	0.0317635	0.00526785	0.00580241	0.000356001	0.0383995	0.00657509	0.0675798	0.0541439	37.2965	2.28829	31.7505	5.2657	7.27596e-08	1.24585e-08
C675 - 23	145.954	166.177	0.878306	0.0307856	0.00360361	0.00567625	0.000188807	0.039427	0.00485489	0.0523939	0.0388901	36.4879	1.21368	30.7876	3.60385	7.27596e-08	8.95935e-09
C675 - 84	40.0817	58.3292	0.687163	0.029318	0.00460602	0.00541939	0.000277351	0.0391313	0.00636238	0.060215	0.0435924	34.8412	1.78309	29.341	4.60963	7.27596e-08	1.183e-08
C675 - 32	79.1403	103.96	0.761254	0.0299854	0.00347113	0.00573561	0.000215324	0.0388631	0.00465408	0.0620329	0.0462657	36.8684	1.3841	29.9992	3.47272	7.27596e-08	8.71339e-09
C675 - 109	117.91	159.951	0.737166	0.0303669	0.00285254	0.00583872	0.00018326	0.0377492	0.00365892	0.0642443	0.0500858	37.5292	1.17793	30.3751	2.85332	7.27596e-08	7.05237e-09
C675 - 45	86.5026	80.9611	1.06845	0.0313744	0.00409301	0.00609826	0.000314776	0.0386055	0.00520546	0.0769057	0.0604703	39.1924	2.02301	31.3675	4.09211	7.27596e-08	9.8107e-09
C675 - 37	76.4907	108.481	0.705105	0.0298838	0.00344247	0.0061822	0.000240445	0.0358012	0.00425084	0.0698467	0.0565642	39.7302	1.54523	29.8989	3.44422	7.27596e-08	8.63907e-09
C675 - 24	149.806	165.171	0.906976	0.0295426	0.00277359	0.00628681	0.00022035	0.0333974	0.00322148	0.0794456	0.0684002	40.4004	1.41602	29.5625	2.77546	7.27596e-08	7.01832e-09
